# Supplementary material for: Remodeling of pSK1 Family Plasmids and Enhanced Chlorhexidine Tolerance in a Dominant Hospital Lineage of Methicillin-Resistant Staphylococcus aureus
Source: PubMed Central journal article supplement (PMC6496109; doi:10.1128/aac.02356-18), 2019-04-25
Supplement: AAC.02356-18-s0001.pdf [file AAC.02356-18-s0001.pdf]

## 1 Supplementary Materials

- 2 **1. Supplementary Methods.** This file contains additional information about materials  
3 and methods used in this study.
- 4 **2. Supplementary Results.** This file contains additional analyses and results relevant to  
5 this study. Part A: Description of the pSK1-like plasmid variants; Part B: Investigation  
6 of the association between plasmid evolution and biocide tolerance.
- 7 **3. Supplementary Dataset.** This file summarises the relevant isolates demographics and  
8 WGS information including sequence data accession numbers for all isolates included  
9 in this study.
- 10 **4. Supplementary Tables.** This file contains additional tables which provide information  
11 about the distribution of gentamicin and chlorhexidine susceptibility in the ST239  
12 MRSA population.
- 13 **5. Supplementary Figure S1. pSK1 plasmid gene presence and synteny.** (A)  
14 Maximum likelihood phylogenetic tree inferred from 3,883 core genome SNPs  
15 illustrates the population structure of ST239 *S. aureus* in Australia. Tips are coloured  
16 based on location (refer to key). Branches with < 70% bootstrap support are coloured  
17 red. (B) Coloured blocks represent the identification of a pSK1 gene orthologue, using  
18 a 95% amino acid identity threshold (excluding insertion sequences). Box length is  
19 reflective of gene length and ordered based on pSK1 (Figure S2A). Boxes are linked if  
20 orthologs were found to be syntenic. Coloured boxes reflect the six identified patterns.
- 21 **6. Supplementary Figure S2. Structure of pSK1, pTW20\_1 and pBPH2003 plasmids.**  
22 Plasmid genes have been coloured based on defined plasmid regions. Insertion  
23 sequences (IS) are coloured grey (IS256) and black (IS257), with target site  
24 duplications (TSD) illustrated: arrows indicate upstream/downstream sequences,  
25 orientation, and are coloured to represent unique sequences (refer to key). (A) pSK1;  
26 sequence and annotations are that previously published, accession NC\_014369 (1). (B)  
27 pTW20\_1; sequence and annotations are that previously published, accession  
28 NC\_017352 (2). (C) pBPH2003; a pTW20\_1-like plasmid representative of that  
29 harboured in isolates from the Asian-Australian ST239 clade.
- 30 **7. Supplementary Figure S3. Modelling temporal-association in phenotypic**  
31 **susceptibility data.** Graphs depict linear models developed to explore the potential  
32 association between gentamicin MIC and chlorhexidine MIC and MBC with the year  
33 in which isolates were recovered. The dotted line indicates the smoothed mean MIC  
34 and the bold line indicates the fitted linear model. Four populations were tested (from  
35 top to bottom): (i) All ST239 MRSA (n = 211), (ii) the Asian-Australian clade (n = 88),  
36 (iii) the Australian clade (n = 123), and (iv) the pSK1-like plasmid harbouring  
37 population (n = 91). Note: reference JKD6008 (Australian clade) was not tested.
- 38 **8. Supplementary Figure S4. Exploration of gene presence/absence signatures**  
39 **associated with phenotypic chlorhexidine tolerance.** The graphs illustrate the  
40 findings from two Discriminant Analysis of Principle Components (DAPC) models,  
41 used to investigate genetic signatures in the ST239 MRSA population associated with  
42 chlorhexidine MIC. The first model (top panel) examined all accessory gene  
43 orthologues (clustered at 95% amino acid homology), and in the second model (bottom

44 panel) gene orthologues associated with either pSK1 or pBPH2003 (representative of  
45 the pTW20\_1-like plasmid recovered from the Asian-Australian clade) were excluded.  
46 The prior hypothesised sub-divisions represent the phenotypic CHX MIC values for the  
47 population, as indicated in the key. (A) Scatter plots illustrate the clustering of isolates  
48 across the two most discriminant functions. The density plots illustrate the same data  
49 in a one-dimensional format for the first (B) and second (C) most discriminant  
50 functions. (D) Loading plots illustrate the contributions of all gene orthologues to the  
51 DAPC models, with the most highly contributing variables ( $> 0.01$ ) coloured based on  
52 whether they represent a plasmid-associated (green) or chromosomal gene orthologue  
53 (blue). (E) Membership graphs illustrate the membership profiles for all isolates,  
54 aligned to a maximum likelihood phylogenetic tree for the ST239 population. The  
55 probability index indicates the likelihood of assigning an isolate back to one of the  
56 hypothesised sub-divisions.

57 **9. Supplementary Figure S5. Exploration of mutations associated with phenotypic**  
58 **chlorhexidine tolerance.** (A) Manhattan plot illustrates the results of three Genome  
59 Wide Association Studies (GWAS) conducted to identify core genome SNPs associated  
60 with CHX MIC, tested at three thresholds:  $\text{MIC} \geq 3 \text{ mg/L}$ ,  $\geq 4 \text{ mg/L}$  or  $= 6 \text{ mg/L}$ . Red  
61 line indicates the threshold for significance (with Bonferroni correction). (B) Maximum  
62 likelihood phylogenetic tree is that from Figure S1, and adjacent are the phenotypic  
63 CHX MIC and MBC values (coloured yellow to red with increasing value). (C) The  
64 presence (blue) or absence (white) of the 50 most significantly associated mutations  
65 detected at each phenotypic threshold are illustrated (refer to key).

66

## 67 **Supplementary Methods**

68 **Bacterial Isolates.** This study utilised a collection of 212 Australian ST239 *S. aureus*, selected  
69 from available collections for temporal and geographic diversity. Isolates were recovered  
70 between 1980 and 2012 from the Australian states of Victoria (n = 123), New South Wales (n  
71 = 62), Queensland (n = 22), South Australia (n = 2), and Western Australia (n = 1). Two  
72 isolates, including reference *S. aureus* JKD6008, were recovered in New Zealand (3). Bacterial  
73 isolates and corresponding whole genome sequence (WGS) data were sourced from:

- 74 • The complete genome of JKD6008 was sourced from (4).
- 75 • 73 isolates were sourced from (5). Six isolates from the original study were excluded  
76 because they represented secondary samples from patients already represented in the  
77 collection. These isolates have only been included in the generation of the global  
78 phylogenetic model (described below).
- 79 • 104 isolates were sourced from the collection of the Australian and New Zealand  
80 Cooperative on Outcome in Staphylococcal Sepsis (ANZCOSS) study (6). All ST239  
81 from unique patients selected for the ANZCOSS sub-study were included (7).
- 82 • 16 isolates were sourced from the collection of the Vancomycin Efficacy in  
83 Staphylococcal Sepsis in Australasia (VANESSA) study (8). All ST239 isolates from  
84 unique patients were included.
- 85 • 18 isolates were sourced from the historic collections (1989-1994) housed at the  
86 Microbiological Diagnostic Unit Public Health Laboratory, Melbourne, Australia. All  
87 ST239 isolates from unique patients in which a viable bacterial isolate could be  
88 recovered were included.

89 To generate a global phylogenetic model for the ST239 lineage the Australian ST239 collection  
90 was supplemented with the publicly available WGS data for 319 globally diverse ST239  
91 isolates, selected to maximise temporal, geographic and genetic diversity of the collection. The  
92 WGS data for these isolates was sourced from:

- 93 • The complete genomes of eight ST239 isolates were sourced from (2, 9-15).
- 94 • 174 isolates were sourced from the collections of (16-22). All ST239 isolates that could  
95 be accessed from these studies were included.
- 96 • 78 isolates were sourced from the collections of (23, 24). A limited number of isolates  
97 were included from both studies, selected to maximise the temporal and geographic  
98 diversity of these collections
- 99 • 29 isolates were sourced from the 2015 Australian Staphylococcal Sepsis Outcome  
100 Program (ASSOP). Sequence data for all ST239 isolates was kindly provided by the  
101 Australian Group on Antimicrobial Resistance (<http://www.agargroup.org/>).
- 102 • A further 24 isolates were sourced from historic collections (1989 – 1994) housed at  
103 the Microbiological Diagnostic Unit Public Health Laboratory, Melbourne, Australia.

104 **Whole Genome Sequencing & Sequence Data.** The WGS data for 42 isolates is novel to this  
105 study (Supplementary Dataset). Genomic DNA was extracted with the JANUS Automated

106 Workstation, using the Chemagic DNA/RNA kit (Perkin Elmer). Unique dual index libraries  
107 were prepared using the Nextera XT DNA preparation kit (Illumina). Libraries were sequenced  
108 on a NextSeq platform (Illumina) with 2 x 150 bp chemistry. Long read sequencing was  
109 conducted on seven isolates (BPH2003 [pTW20\_1-like], BPH2019 [SV3], BPH2056 [SV1],  
110 BPH2070 [SV2], BPH2869 [SV6], BPH3244 [SV4], and JKD6009 [SV5]). Genomic DNA  
111 was extracted using the DNeasy Blood & Tissue extraction kit (Qiagen) and sequencing was  
112 conducted on the Pacific Biosciences RS-II platform with P6-C4 chemistry. WGS data  
113 accession numbers can be found in the Supplementary Dataset.

114 **Genome Assembly.** Long-read sequence data was *de novo* assembled in the SMRT Analysis  
115 System v2.3.0.140936 (Pacific Biosciences), using the protocol previously described (25).  
116 Briefly, raw sequence data was first assembled using the HGAP v3 protocol, with a minimum  
117 seed read length of 10,000 bp, genome size of 3 Mb, target coverage of 10 and an overlapper  
118 error rate of 0.04. Contigs underwent a second round of error correction using Quiver v1, then  
119 were circularised with the overlap removed and orientated to *dnaA* or *repA* in Geneious v8.1.5  
120 (Biomatters). Long reads were aligned to the assembly using BridgeMapper v1 and manually  
121 checked for assembly errors. The consensus sequence from this alignment was further error  
122 corrected with high quality short-read Illumina data using Snippy v3.2  
123 (<https://github.com/tseemann/snippy/>), performed in an iterative process until no variants were  
124 detected. The final sequences were annotated with Prokka v1.12. Structural comparison of the  
125 complete plasmid sequences were conducted using the Artemis Comparison Tool (26), filtering  
126 out hits < 100 bp in length.

127 Short read sequence data was *de novo* assembled using SPAdes v3.11.0 (27), excluding the  
128 pre-assembly error correction (“--only-assembler”), including post-assembly error correction  
129 (“--careful”) and a minimum coverage threshold of five (“--cov-cutoff”) to remove potential  
130 contaminants. Assemblies were annotated using Prokka v1.12 (28) and contigs < 200 bp in  
131 length were excluded. Contig coverage information was extracted from the assembly data, with  
132 the ratio of coverage between chromosome and plasmid associated contigs used to approximate  
133 plasmid and gene copy number.

134 **Orthologue Clustering & Gene Synteny.** The presence/absence of plasmid gene orthologues  
135 was used to screen short-read assemblies for the presence of a pSK1-like plasmids. The  
136 pangenome pipeline Roary (29) was used to perform the ortholog clustering. The protein  
137 coding sequences (CDS) identified in the annotated complete genomes and short-read *de novo*  
138 assemblies were clustered into orthologous groups at different thresholds of amino acid  
139 homology (75%, 80%, 85%, 90%, and 95%), without splitting paralogs (option “-s”). No  
140 significant variation was observed in the clustering across the different homology thresholds  
141 (data not shown), subsequently all analyses published here use a 95% amino acid homology  
142 threshold. Genes were deemed to be syntenic if the CDS were identified as adjacent on a single  
143 contig.

144 **Phylogenetic Analysis.** The Illumina short-read sequence data for the 211 Australian ST239  
145 *S. aureus* were mapped to the complete genome of reference JKD6008 (CP002120, (4)), using  
146 Snippy v3.2 (<https://github.com/tseemann/snippy/>). An alignment of core genome single

147 nucleotide polymorphisms (SNP) was generated using a minimum coverage of 10 reads, and  
148 base-call stringency of 90%. SNPs were deemed core if a base was called for every isolate in  
149 the alignment at that site. This alignment was used as the input to generate a maximum  
150 likelihood phylogenetic tree with IQ-TREE v1.6.1 (30), modelled with a General Time  
151 Reversible (GTR) nucleotide substitution model, empirical base frequencies, a correction for  
152 the absence of invariant sites, use of a discrete Gamma model with four rate categories (model  
153 option “GTR+F+I+G4”), and 1,000 ultrafast bootstrap replicates (option “-bb 1000”).  
154 Two additional mapped alignments were generated: (i) to represent the global ST239 collection  
155 (n = 531, mapped to JKD6008), and (ii) to represent the Australian ST239 clade (n = 124,  
156 mapped to JKD6008) using the process described above. Recombination was assessed using  
157 ClonalFrameML v.1.11 (31). However, as very few recombinant events were detected (data  
158 not shown) masking these sites prior to temporal phylogenetic analysis was deemed  
159 unnecessary. The package BEAST v2.4.7 (32) was used to construct the time-aware phylogenetic  
160 models. From the whole genome alignments, the core genome SNPs were extracted, grouped  
161 into a single partition and modelled with the following parameters. The year of isolation was  
162 provided as a prior. The GTR model of nucleotide substitution was selected, with the  
163 substitution rate estimated using four gamma categories. A relaxed lognormal clock model and  
164 a coalescent constant population model were selected (based on previous ST239 studies (5,  
165 33)). Invariant sites were included as a constant pattern, weighted based on the nucleotide  
166 proportions of reference JKD6008. For the Australian clade, chlorhexidine MIC data was  
167 modelled as a discrete trait. Five 50 million step iterations were run and examined for  
168 convergence in Tracer v1.6 (<http://tree.bio.ed.ac.uk/software/tracer/>). The burn-in was adjusted  
169 for each run to a point at which a stable likelihood was achieved. All runs converged, and none  
170 were discarded, based on the comparisons of Bayes Factors, calculated from the harmonic  
171 means of the run likelihoods, and the attainment of effective sample sizes (> 200) in all  
172 measurements. Runs were joined and re-sampled at a frequency that would achieve ~10,000  
173 trees using LogCombiner. Maximum clade credibility (MCC) trees with median node heights  
174 were generated in TreeAnnotator.

175 **Genome Wide Association Study (GWAS).** Allelic association was performed using the  
176 GWAS tool Plink (34). Core genome SNPs (identified as described above) were used as the  
177 input. Three phenotypic divisions were tested, with the tolerant populations defined as a MIC  
178  $\geq 3$ ,  $\geq 4$  or 6 mg/L. A Bonferroni correction was used to account for multiple hypothesis testing,  
179 the significance threshold determined as 0.05/number of SNPs tested.

180 **Discriminant Analysis of Principal Components (DAPC).** DAPC was implemented in R  
181 v3.4.2 (<http://www.R-project.org/>) using the package adegenet (35). Presence or absence of the  
182 CDS ortholog groups (identified as described above) were used as the input for the DAPC  
183 models, filtering out core ortholog groups (present in  $\geq 210$  isolates) and singletons groups  
184 (present in  $\leq 3$  isolates). Two models were generated: (i) all CDS ortholog groups that met the  
185 input criteria, and (ii) the same data set excluding all plasmid-associated CDS. In both models,  
186 isolates were assigned to prior populations based on chlorhexidine MIC values (1, 1.5, 2, 3, 4,  
187 and 6 mg/L). DAPC models were assessed individually to determine the optimum number of

188 principle components to be retained, based on the a-score and cross validation functions in  
189 adegenet.

190 **Antimicrobial Susceptibility Testing.** Phenotypic susceptibility testing for gentamicin and  
191 trimethoprim was performed using E-tests (bioMérieux), following the manufacturer's  
192 recommendations. *S. aureus* isolate ATCC29213 was used as a control. All results were read  
193 in triplicate and interpreted using CLSI guidelines (M100S, 26<sup>th</sup> Ed).

194 Phenotypic susceptibility testing to chlorhexidine (CHX) was performed by broth  
195 microdilution, as per the CLSI protocol for antimicrobial susceptibility testing (M07A10E,  
196 January 2015). Chlorhexidine digluconate was sourced from Sigma-Aldrich (#C9394) and  
197 diluted in sterile H<sub>2</sub>O to 128 mg/L. In microtiter trays (Costar, #3799), serial dilutions of 100µl  
198 of CHX in cation adjusted Muller Hinton (CaMH) broth (Oxoid) were generated to a final  
199 concentration range of 1.0 - 32 mg/L, tested in 1.5x increments. A second concentration range  
200 of 0.25 - 8 mg/L was also used to test isolates found to have MIC values < 2 mg/L. Bacterial  
201 isolates, from a fresh overnight plate culture, were resuspended in saline and adjusted to a  
202 starting concentration equivalent to a 0.5 McF solution, then diluted 1:100 in CaMH broth. In  
203 a 1:1 ratio, 100µl of the bacterial suspension was added to each well, and 200µl to an empty  
204 growth control well. Microtiter plates were incubated for 24 hours in a static condition at 37°C.  
205 The MIC was interpreted as the well of lowest concentration with no visible growth.

206 To assess viability post CHX exposure (approximate MBC determination), after the MIC was  
207 read 10µl from each well in the microtiter plate was sub-cultured to a CaMH agar plate (Oxoid).  
208 No CHX inhibitors were added. Plates were incubated for 24 hours at 37°C. The MBC was  
209 interpreted as the lowest concentration in which no growth was observed, growth being defined  
210 as  $\geq 2$  colonies. All isolates were tested in biological triplicate. A fourth BMD was performed  
211 if the first three replicates were found to have a range in excess of 2 wells in the MIC, or 4  
212 wells in the MBC. The median values were used for statistical analysis. Controls were tested  
213 regularly and a minimum of twice for every batch performed from a fresh dilution of CHX.  
214 Controls included *S. aureus* isolate ATCC29213, JKD6008 and culture-negative wells.

215 All statistical analyses were performed in R v3.4.2 (<http://www.R-project.org/>). Prior to  
216 significance testing all MIC and MBC values were transformed to a log<sub>2</sub> scale. Comparison of  
217 MIC or MBC values between two population were conducted using a Welsh two sample t-test.  
218 Simple linear models were generated to assess temporal trends, comparing year of isolation  
219 against log transformed MIC and MBC data using the function "lm". Significance was  
220 determined as a p value  $\leq 0.05$ .

## 221 **Supplementary Results**

### 222 **Part A: Description of the pSK1-like plasmid variants**

223 A description of the pSK1-like plasmid variants, as identified through long-read sequencing,  
224 has been described in the main text and Figure 2. Provided here is further detail about these  
225 plasmid structures and how the insertion sequence (IS) features, specifically the non-coding  
226 regions (NCRs), the terminal inverted repeats (TIRs), the target site duplications (TSD), and  
227 their location relative to plasmid and chromosomal genes were used to identify which pSK1-  
228 like SV was likely carried by each ST239 isolate.

229 **SV1: Absence of Tn4001.** In pSK1, Tn4001 is flanked by inverted copies of IS256 with perfect  
230 8 bp TSD (TAAGTAAA). In SV1 only a single copy of this TSD sequence was identified in  
231 isolation from an IS256 NCR at the expected plasmid location for Tn4001 (Figure 2A). Tn4001  
232 is highly mobile and has been found at multiple chromosomal and plasmid locations (36, 37).  
233 In BPH2056 (SV1 representative genome), a chromosomal copy of Tn4001 was identified,  
234 flanked by perfect 8 bp TSD (CAAAATCA), located downstream of a hypothetical protein in  
235 close proximity to the DNA-directed DNA polymerase III alpha subunit (*dnaE*) gene. Using  
236 this variation in TSD patterns flanking Tn4001, it was identified that of the ten short-read  
237 assemblies which demonstrated an orthologue pattern consistent with SV1 (Figure S1), five  
238 likely carried a plasmid consistent with pSK1 (with Tn4001 located in the plasmid), and the  
239 other five likely carried a plasmid consistent with SV1, with a chromosomal copy of Tn4001  
240 identified in four isolates.

241 **SV2: IS256-Mediated Chromosomal Integration & Loss of 5,175 bp.** Chromosomal  
242 integration of SV2 was mediated by IS256, with two inverted copies flanking the 24,299 bp  
243 region, termed IS256-R and IS256-2. A third copy (IS256-L) is present as part of Tn4001  
244 (Figure 2B). Additionally, SV2 has a 5,175 bp deletion with loss of six genes when compared  
245 to pSK1 (Figure 2B). The upstream TSD for IS256-2 and IS256-R (external to SV2) were  
246 identical and represented a novel sequence (GAGTTGAC). A second novel TSD was identified  
247 downstream of IS256-2 (internal to SV2, ATGATTTC), with a single copy of the same  
248 sequence identified in pSK1 (not adjacent to an IS256 NCR) at the boundary of the region  
249 absent in SV2 (Figure 2B). This TSD pattern was identified in all seven short-read assemblies  
250 which demonstrated an orthologue pattern consistent with SV2, suggesting that they all carried  
251 this integrated plasmid variant.

252 **SV3: IS257-Mediated Deletion of Tn4003 & IS256-Mediated Inversion.** In pSK1, Tn4003 is  
253 flanked by direct copies of IS257 with perfect 8 bp TSD (TTTTATAA). In SV3, only a single  
254 copy of IS257 was identified, flanked by the same TSD (Figure 2A). Additionally, SV3 also  
255 had a 3,488 bp inversion compared to pSK1, flanked by IS256-R and IS256-3 (Figure 2A). The  
256 upstream TSD for IS256-R (internal to the inversion) and the downstream TSD for IS256-3  
257 (external to the inversion) represented a novel sequence (TTTGAGTT), the former was  
258 identified in the reverse complement. A single copy of the same sequence (TTTGAGTT) was  
259 identified at the boundary for the inverted segment in pSK1 (Figure 2A, indicated by the dark  
260 red circle). The upstream TSD for IS256-3 (internal to the inversion, TTTACTTA) was the



261 same sequence as the upstream TSD for IS256-R in pSK1 (TAAGTAAA), but in the reverse  
262 complement (Figure 2A). Utilising the variation in TSD pattern, including the change in  
263 sequence orientation and adjacent plasmids genes, it was identified that only seven of the  
264 eleven short-read assemblies which demonstrated an orthologue pattern consistent with SV3  
265 were likely to carry this plasmid variant.

266 **SV4: IS256-Mediated Chromosomal Integration & Loss of 3,488 bp.** Chromosomal  
267 integration of SV4 was mediated by IS256, with two inverted copies flanking the 22,047 bp  
268 region. A 3,488 bp region, specifically the region inverted in SV3 was absent (Figure 2B). All  
269 internal TSDs were found to correspond with those identified in SV3. The TSD upstream of  
270 IS256-R and IS256-3 (external to SV4) were novel (CTTTGTAT) (Figure 2B). This TSD  
271 pattern was identified in all four short-read assemblies which demonstrated an orthologue  
272 pattern consistent with SV4.

273 **SV5': IS257-Mediated Chromosomal Integration & Loss of 404 bp, SV5: IS257-Mediated**  
274 **Inversion & Disruption of Replication Machinery & SV6: IS256-Mediated Deletion of 5,105**  
275 **bp.** A hypothesised structure has been developed for SV5', which represents an intermediate  
276 structure in the development of SV5 and SV6 (Figure 2). Chromosomal integration in SV5'  
277 would likely be mediated by IS257, inserting 9,233 bp upstream of a disrupted copy of the  
278  $\beta$ -haemolysin gene. For compatibility with the recovered SV5 structure, this region would be  
279 flanked by IS257-R1 and IS257-R2 from pSK1, located in the same orientation, with absence  
280 of the intervening 404 bp region (Figure 2C). All TSD that are internal to SV5' would be  
281 unaltered from the sequences identified in pSK1. The TSD downstream of IS257-R2 and  
282 IS257-R1 (external to SV5') would represent a novel perfect 8 bp TSD (GTTTTTAC).

283 In SV5, the intermediate SV5' has undergone a 42,660 bp inversion (Figure 2C). This would  
284 likely be the result of intramolecular replicative transposition in the inverse orientation (38),  
285 and result in the creation of a novel pair of 8 bp TSD (TTCTTATC), located adjacent (in  
286 opposite orientations) to both copies of IS257-R2\*, one external to the inverted region  
287 (adjacent to the unaffected region of  $\phi$ Sa3) and the other one internal (adjacent to the inverted  
288 region of  $\phi$ Sa3) (Figure 2C). In addition to the inversion, a 45 bp deletion in *repA* was detected  
289 in SV5, causing fragmentation of the gene annotation.

290 In a separate event, the intermediated SV5' structure has undergone an IS256-mediated 5,105  
291 bp deletion event, resulting in the 22,520 bp structure SV6 (Figure 2B). All TSD are identical  
292 to those presented in the hypothesised SV5' except for one; the upstream TSD for IS256-R  
293 (AAATTGTG) is novel. A single copy of this TSD was identified in pSK1, not adjacent to an  
294 IS256 NCR at the boundary for the deletion (Figure 2A).

295 Of the remaining 63 short-read assemblies, four had an orthologue pattern consistent with SV3,  
296 21 with SV5, and 38 with SV6. Using the variation in TSD patterns described above, it was  
297 identified that 24 isolates likely harboured an integrated plasmid consistent with SV5', three  
298 with the inverted SV5, and 36 with the shortened SV6. All 63 isolates formed a single  
299 monophyletic clade from the expected ancestral node in which SV5' is predicted to have  
300 emerged (Figure 3). Further, these classifications were completely congruent with the



301 phylogenetic tree, consistent with the proposed development of these plasmid variants (Figure  
302 3). All isolates harbouring an SV5'-like or SV5-like plasmid variant appeared to have disrupted  
303 plasmid replication machinery, the large majority demonstrating a fragmented *repA* gene  
304 annotation (Figure S1). Two isolates had more extensive deletions, with loss of multiple genes  
305 similar to SV6 (Figure 3 & Figure S1). These two isolates appear to represent two further  
306 independent IS256-mediated deletion events that have occurred following chromosomal  
307 integration. Similarly, four isolates appeared to have undergone an IS257-mediated deletion of  
308 Tn4003, with their location in the phylogeny suggestive of two independent events (Figure 3  
309 & Figure S1).

## 310 **Part B: Investigation of the association between plasmid evolution and biocide tolerance**

311 Provided here are the additional investigations undertaken to explore the potential association  
312 between the emergence of the pSK1-like plasmid SVs and the development of chlorhexidine  
313 tolerance in the ST239 population.

314 **Mutations in *qacAR*.** A comparison of all *qacAR* sequences (n = 89 pSK1-like, n = 67  
315 pTW20\_1-like) to reference JKD6008 (Australian clade) identified six SNPs resulting in  
316 missense mutations: five in *qacA* and one in *qacR*. The most common mutation resulted in a  
317 QacA T<sub>358</sub>I amino acid (aa) change. This SNP was identified in all 67 *qacA*-containing Asian-  
318 Australian clade isolates and none of the *qacA*-containing Australian clade isolates. As this  
319 mutation was invariably associated with one plasmid type, irrespective of MIC, it represented  
320 the distinct evolutionary histories of the *qacA* genes in these different plasmid populations and  
321 was unlikely to be contributing to phenotypic variation. The only other two commonly  
322 observed mutations were identified in the Australian clade and resulted in a QacA H<sub>164</sub>Q or a  
323 QacA V<sub>408</sub>I aa change. These mutations were phylogenetically correlated, QacA H<sub>164</sub>Q was  
324 identified in 14/18 isolates that harboured SV2, SV3 or SV4, and QacA V<sub>408</sub>I was identified in  
325 8/13 isolates that harboured SV3 or SV4. The presence of these mutations did not correlate  
326 with CHX phenotype, suggesting that these SNPs were most likely markers of clonal evolution  
327 and not significant contributors to the larger shift in CHX tolerance.

328 **Plasmid and *qacA* copy number.** Intermediate sized staphylococcal plasmids like pSK1 are  
329 generally considered to be low copy number plasmids (1). Multiple copies of *qacA*, resulting  
330 from increased plasmid or gene copy number could potential be contributing to the phenotypic  
331 variation observed between the Australian and Asian-Australian clades. To investigate this,  
332 *qacA* gene copy number was estimated by comparing the mapped sequence read depth of  
333 contigs representing the plasmid regions (as defined in Figure S2) to those representing the  
334 chromosome. The ratio of mapped-reads in the plasmid contigs representing region 4  
335 (containing *qacAR*) and region 1 (plasmid backbone) were 0.89 ( $\pm$  0.18) in the pSK1-like  
336 population and 1.12 ( $\pm$  0.41) in the pBPH2003-like (pTW20\_1-like) population. This suggested  
337 that each plasmid copy contained only a single copy of *qacA*. The ratio of mapped-reads in  
338 these same contigs compared to contigs representing the chromosome (specifically those  
339 containing *dnaA*) were 0.68 ( $\pm$  0.28) and 0.77 ( $\pm$  0.24) in the pSK1-like population, and 2.81  
340 ( $\pm$  1.32) and 2.69 ( $\pm$  1.33) in the pBPH2003-like population for region 4 and region 1

341 respectively. These ratios suggested that the pSK1-like plasmids were typically single copy in  
342 the Australian clade isolates, consistent with most isolates harbouring a chromosomally  
343 integrated variant. No significant differences were observed between isolates that harboured  
344 an extra-chromosomal or integrated pSK1-like variant. Conversely, the Asian-Australian  
345 isolates carried one to four copies of a pBPH2003-like plasmid. As this clade has a lower  
346 average MIC to chlorhexidine (Table 2), plasmid copy number did not appear to be contributing  
347 to the variation observed in phenotypic CHX susceptibility.

348 ***Discriminant Analysis of Principle Components.*** DAPC is a multivariate technique that can  
349 be used to reconstruct population subdivisions hypothesised to be present using genomic data;  
350 it finds the smallest number of principle components to build discriminant functions that  
351 minimise within group variation and maximise between group variation (39). This approach  
352 was utilised to identify potential associations between phenotypic CHX MIC and the presence  
353 and/or absence of specific genes. In this analysis the population subdivisions hypothesised to  
354 be present in the dataset were the CHX MIC values (1, 1.5, 2, 3, 4, and 6 mg/L). Two models  
355 were generated: (i) one dataset representing all accessory genes identified in the ST239  
356 collection (n = 212), and (ii) the same dataset with the pSK1 and pBPH2003 (pTW20\_1-like)  
357 genes excluded.

358 In the first model, broad clusters were able to be resolved that reflected the low (1, 1.5, and 2  
359 mg/L), medium (3 mg/L) and high (4 and 6 mg/L) MIC values (Figure S4A, B, C). The top  
360 contributing variables in this separation were *qacAR* and the co-located genes in plasmid region  
361 4 in the first discriminant function, and the genes specific to pBPH2003 in the second  
362 discriminant function (Figure S4D). This finding is consistent with the increase in MIC that  
363 was associated with plasmid acquisition and the distinct CHX susceptibility profiles of the  
364 pSK1-like and pBPH2003-like populations (Table 2). Furthermore, as all but one of the *qacA*-  
365 negative isolates belonged to the Australian clade, the second discriminant function was also  
366 reflective of the phylogenetic division in the ST239 population (Figure S4E).

367 In the second model the MIC-reflective clusters were less defined (Figure S4A, B, C). There  
368 was some separation based on chromosome-associated gene orthologues, none of which  
369 appeared to be associated with efflux systems based on gene annotations (not shown). The  
370 membership profiles of the isolates in this model (a measure of assignment probability to the  
371 prior hypothesised subdivisions) appeared to be strongly correlated with the phylogeny (Figure  
372 S4E), which suggested that this DAPC model was detecting the underlying phylogenetic  
373 divisions within the population, which correlated with both CHX MIC and emergence of the  
374 pSK1-like plasmid variants.

375 ***Genome Wide Association Studies.*** A GWAS analysis was utilised to explore whether  
376 mutation in the core genome were associated with CHX MIC. This dataset was tested at three  
377 different phenotypic divisions, with the tolerant population defined as a MIC  $\geq 3$ ,  $\geq 4$  or 6  
378 mg/L. Numerous mutations were identified as significantly associated with MIC after  
379 correcting for multiple hypothesis testing (Figure S5A). Examination of the 50 most significant  
380 SNPs for each phenotypic division found all to be strongly correlated with the phylogenetic  
381 model for the ST239 population (Figure S5B). GWAS approaches are highly susceptible to

382 phylogenetically correlated phenotypes and even if a phylogenetic penalty was applied, it may  
383 not be possible to detect a SNP in this dataset that is responsible for increased CHX MICs using  
384 this approach.

385 The efflux system encoded by *norA* can actively export CHX and mutations in this gene, and  
386 a homologue *norB*, have been associated with enhanced CHX tolerance (40-42). Mutations  
387 were detected in both *norA* and *norB* in this dataset, however none were significantly associated  
388 with CHX MIC in any phenotypic division tested.

389 **Supplementary Tables**390 **Table S1. Investigation of Gentamicin Resistance in Australian ST239 MRSA**

| Isolate Populations (n)            | Median (mg/L) |     | Isolate Populations (n)       | Median (mg/L) |     | P value  |
|------------------------------------|---------------|-----|-------------------------------|---------------|-----|----------|
|                                    |               | MIC |                               |               | MIC |          |
| <b>All ST239 (211)</b>             |               |     |                               |               |     |          |
| Australian Clade (123)             | 10.30         | vs  | Asian-Australian Clade (88)   | 179.80        |     | < 0.0001 |
| No AME (91)                        | 0.38          | vs  | <i>aac(6')-aph(2'')</i> (181) | 58.20         |     | < 0.0001 |
|                                    |               | vs  | <i>aadD</i> (73)              | 15.20         |     | < 0.0001 |
|                                    |               | vs  | <i>aph(3')-III</i> (95)       | 190.50        |     | < 0.0001 |
| <b>Australian Clade (123)</b>      |               |     |                               |               |     |          |
| No AME (19)                        | 0.39          | vs  | <i>aac(6')-aph(2'')</i> (99)  | 21.90         |     | < 0.0001 |
|                                    |               | vs  | <i>aadD</i> (73)              | 15.20         |     | < 0.0001 |
|                                    |               | vs  | <i>aph(3')-III</i> (8)        | 164.90        |     | < 0.0001 |
| <b>Asian-Australian Clade (88)</b> |               |     |                               |               |     |          |
| No AME (1) <sup>a</sup>            | 0.38          | vs  | <i>aac(6')-aph(2'')</i> (82)  | 189.70        |     | -        |
|                                    |               | vs  | <i>aph(3')-III</i> (87)       | 193.00        |     | -        |

391 Abbreviations: AME, aminoglycoside modifying enzyme; MIC, minimum inhibitory concentration.

392 <sup>a</sup> Statistical analysis was not performed as only a single isolate was identified harbouring no AME genes.

393

394

395 **Table S2. Gentamicin Resistance and Chlorhexidine Tolerance Profiles**

| SK1 Plasmids (n)                                    | Gentamicin MIC | Median (mg/L)     |                   |
|-----------------------------------------------------|----------------|-------------------|-------------------|
|                                                     |                | Chlorhexidine MIC | Chlorhexidine MBC |
| <b>Structural Variants</b>                          |                |                   |                   |
| No SK1 Plasmid (32)                                 | 1.80           | 1.80              | 4.60              |
| SV1 (5)                                             | 142.10*        | 2.80              | 7.30              |
| pSK1 (5)                                            | 9.60           | 2.40              | 6.20              |
| SV2 (7)                                             | 9.20           | 3.30              | 7.30              |
| SV3 (7)                                             | 15.90          | 4.40              | 9.70              |
| SV4 (4)                                             | 15.30          | 4.90              | 10.80             |
| SV5' (3)                                            | 15.10          | 5.20              | 10.50             |
| SV5 (24)                                            | 16.00          | 4.00              | 8.90              |
| SV6 (36)                                            | 21.50          | 5.00              | 8.80              |
| <b>Structural Changes Grouped</b>                   |                |                   |                   |
| Extra-chromosomal (17) <sup>a</sup>                 | 26.10          | 3.20              | 7.80              |
| Integrated + <i>repA</i> deletion (25) <sup>b</sup> | 19.10          | 3.70              | 8.50              |
| Integrated + MG deletion (49) <sup>c</sup>          | 18.60          | 4.70              | 8.60              |

396 Abbreviations: MIC, minimum inhibitory concentration; MG, multi-gene; SV, pSK1-like structural variant.

397 <sup>a</sup> Includes all isolates classified as harbouring SV1, prototypical SK1 and SV3.398 <sup>b</sup> Includes all isolates classified as SV5' and SV5 with a fragmented pSK1 *repA* sequence identified.399 <sup>c</sup> Includes all isolates classified as SV2, SV4, SV5', SV5 and SV6 with a multi-gene deletion in pSK1 region 1.400 \* All five isolates representing SV1 carry *aph(3')-III*.

401

402 **References**

- 403 1. Jensen SO, Apisiridej S, Kwong SM, Yang YH, Skurray RA, Firth N. 2010. Analysis of the  
404 prototypical *Staphylococcus aureus* multiresistance plasmid pSK1. *Plasmid* 64:135-142.
- 405 2. Holden MTG, Lindsay JA, Corton C, Quail MA, Cockfield JD, Pathak S, Batra R, Parkhill J, Bentley  
406 SD, Edgeworth JD. 2010. Genome sequence of a recently emerged, highly transmissible, multi-  
407 antibiotic- and antiseptic-resistant variant of methicillin-resistant *Staphylococcus aureus*,  
408 sequence type 239 (TW). *J Bacteriol* 192:888-892.
- 409 3. Howden BP, Johnson PDR, Ward PB, Stinear TP, Davies JK. 2006. Isolates with low-level  
410 vancomycin resistance associated with persistent methicillin-resistant *Staphylococcus aureus*  
411 bacteremia. *Antimicrob Agents Chemother* 50:3039-3047.
- 412 4. Howden BP, Seemann T, Harrison PF, McEvoy CR, Stanton J-AL, Rand CJ, Mason CW, Jensen  
413 SO, Firth N, Davies JK, Johnson PDR, Stinear TP. 2010. Complete genome sequence of  
414 *Staphylococcus aureus* strain JKD6008, an ST239 clones of methicillin-resistant *Staphylococcus*  
415 *aureus* with intermediate level vancomycin resistance. *J Bacteriol* 192:5848-5849.
- 416 5. Baines SL, Holt KE, Schultz MB, Seemann T, Howden BO, Jensen SO, van Hal SJ, Coombs GW,  
417 Firth N, Powell DR, Stinear TP, Howden BP. 2015. Convergent adaptation in the dominant  
418 global hospital clone ST239 of methicillin-resistant *Staphylococcus aureus*. *MBio* 6:e00080.
- 419 6. Turnidge JD, Kotsanas D, Munckhof W, Roberts S, Bennett CM, Nimmo GR, Coombs GW,  
420 Murray RJ, Howden B, Johnson PD, Dowling K, Australia New Zealand Cooperative on  
421 Outcomes in Staphylococcal S. 2009. *Staphylococcus aureus* bacteraemia: a major cause of  
422 mortality in Australia and New Zealand. *Med J Aust* 191:368-73.
- 423 7. Holmes NE, Turnidge JD, Munckhof WJ, Robinson JO, Korman TM, O'Sullivan MVN, Anderson  
424 TL, Roberts SA, Gao W, Christiansen KJ, Coombs GW, Johnson PDR, Howden BP. 2011.  
425 Antibiotic choice may not explain poorer outcomes in patients with *Staphylococcus aureus*  
426 bacteremia and high vancomycin minimum inhibitory concentration. *J Infect Dis* 204:340-347.
- 427 8. Holmes NE, Robinson JO, van Hal SJ, Munckhof WJ, Athan E, Korman TM, Cheng AC, Turnidge  
428 JD, Johnson PDR, Howden BP, Vanessa study group obotASfIDCRN. 2018. Morbidity from in-  
429 hospital complications is greater than treatment failure in patients with *Staphylococcus*  
430 *aureus* bacteraemia. *BMC Infect Dis* 18:107.
- 431 9. Chen F-J, Lauderdale T-L, Wang L-S, Hsuang I-W. 2013. Complete genome sequence of  
432 *Staphylococcus aureus* Z172, a vancomycin-intermediate and daptomycin-nonsusceptible  
433 methicillin-resistant strain isolated in Taiwan. *Genome Announc* 1:e01011-13.
- 434 10. Costa MO, Beltrame CO, Ferreira FA, Botelho AM, Lima NC, Souza RC, de Almeida LG,  
435 Vasconcelos AT, Nicolas MF, Figueiredo AM. 2013. Complete Genome Sequence of a Variant  
436 of the Methicillin-Resistant *Staphylococcus aureus* ST239 Lineage, Strain BMB9393, Displaying  
437 Superior Ability To Accumulate ica-Independent Biofilm. *Genome Announc* 1.
- 438 11. Botelho AM, Costa MO, Beltrame CO, Ferreira FA, Cortes MF, Bandeira PT, Lima NC, Souza RC,  
439 Almeida LG, Vasconcelos AT, Nicolas MF, Figueiredo AM. 2016. Complete genome sequence  
440 of an agr-dysfunctional variant of the ST239 lineage of the methicillin-resistant *Staphylococcus*  
441 *aureus* strain GV69 from Brazil. *Stand Genomic Sci* 11:34.
- 442 12. Botelho AM, Costa MO, Beltrame CO, Ferreira FA, Lima NC, Costa BS, de Morais GL, Souza RC,  
443 Almeida LG, Vasconcelos AT, Nicolas MF, Figueiredo AM. 2016. Complete Genome Sequence  
444 of the MRSA Isolate HC1335 from ST239 Lineage Displaying a Truncated AgrC Histidine Kinase  
445 Receptor. *Genome Biol Evol* 8:3187-3192.
- 446 13. McClure JA, Zhang K. 2017. Complete Genome Sequence of the Methicillin-Resistant  
447 *Staphylococcus aureus* Colonizing Strain M92. *Genome Announc* 5.
- 448 14. Li Y, Cao B, Zhang Y, Zhou J, Yang B, Wang L. 2011. Complete genome sequence of  
449 *Staphylococcus aureus* T0131, an ST239-MRSA-SCCmec type III clones isolated in China. *J*  
450 *Bacteriol* 193:3411-3412.

- 451 15. Zhang X, Xu X, Yuan W, Hu Q, Shang W, Hu X, Tong Y, Rao X. 2014. Complete Genome Sequence  
452 of *Staphylococcus aureus* XN108, an ST239-MRSA-SCCmec III Strain with Intermediate  
453 Vancomycin Resistance Isolated in Mainland China. *Genome Announc* 2.
- 454 16. Alam MT, Petit RA, 3rd, Crispell EK, Thornton TA, Conneely KN, Jiang Y, Satola SW, Read TD.  
455 2014. Dissecting vancomycin-intermediate resistance in *staphylococcus aureus* using  
456 genome-wide association. *Genome Biol Evol* 6:1174-85.
- 457 17. Castillo-Ramirez S, Corander J, Marttinen P, Aldeljawi M, Hanage WP, Westh H, Boye K,  
458 Bentley SD, Parkhill J, Holden MT, Feil EJ. 2012. Phylogeographic variation in recombination  
459 rates within a global clone of methicillin-resistant *Staphylococcus aureus*. *Genome Biol*  
460 13:R126.
- 461 18. Harris SR, Feil EJ, Holden MTG, Quail MA, Nickerson EK, Chantratita N, Gardete S, Tavares A,  
462 Day N, Lindsay JA, Edgeworth JD, de Lencastre H, Parkhill J, Peacock SJ, Bentley SD. 2010.  
463 Evolution of MRSA during hospital transmission and intercontinental spread. *Science* 327:469-  
464 474.
- 465 19. Kong Z, Zhao P, Liu H, Yu X, Qin Y, Su Z, Wang S, Xu H, Chen J. 2016. Whole-Genome Sequencing  
466 for the Investigation of a Hospital Outbreak of MRSA in China. *PLoS One* 11:e0149844.
- 467 20. Moradigaravand D, Jamrozy D, Mostowy R, Anderson A, Nickerson EK, Thaipadungpanit J,  
468 Wuthiekanun V, Limmathurotsakul D, Tandhavanant S, Wikraiphath C, Wongsuvan G,  
469 Teerawattanasook N, Jutrakul Y, Srisurat N, Chaimanee P, Eoin West T, Blane B, Parkhill J,  
470 Chantratita N, Peacock SJ. 2017. Evolution of the *Staphylococcus argenteus* ST2250 Clone in  
471 Northeastern Thailand Is Linked with the Acquisition of Livestock-Associated Staphylococcal  
472 Genes. *MBio* 8.
- 473 21. Reuter S, Torok ME, Holden MT, Reynolds R, Raven KE, Blane B, Donker T, Bentley SD,  
474 Aanensen DM, Grundmann H, Feil EJ, Spratt BG, Parkhill J, Peacock SJ. 2016. Building a  
475 genomic framework for prospective MRSA surveillance in the United Kingdom and the  
476 Republic of Ireland. *Genome Res* 26:263-70.
- 477 22. Senghore M, Bayliss SC, Kwambana-Adams BA, Foster-Nyarko E, Manneh J, Dione M, Badji H,  
478 Ebruke C, Doughty EL, Thorpe HA, Jasinska AJ, Schmitt CA, Cramer JD, Turner TR, Weinstock  
479 G, Freimer NB, Pallen MJ, Feil EJ, Antonio M. 2016. Transmission of *Staphylococcus aureus*  
480 from Humans to Green Monkeys in The Gambia as Revealed by Whole-Genome Sequencing.  
481 *Appl Environ Microbiol* 82:5910-7.
- 482 23. Hsu LY, Harris SR, Chlebowicz MA, Lindsay JA, Koh TH, Krishnan P, Tan TY, Hon PY, Grubb WB,  
483 Bentley SD, Parkhill J, Peacock SJ, Holden MT. 2015. Evolutionary dynamics of methicillin-  
484 resistant *Staphylococcus aureus* within a healthcare system. *Genome Biol* 16:81.
- 485 24. Tong SY, Holden MT, Nickerson EK, Cooper BS, Koser CU, Cori A, Jombart T, Cauchemez S,  
486 Fraser C, Wuthiekanun V, Thaipadungpanit J, Hongsuwan M, Day NP, Limmathurotsakul D,  
487 Parkhill J, Peacock SJ. 2015. Genome sequencing defines phylogeny and spread of methicillin-  
488 resistant *Staphylococcus aureus* in a high transmission setting. *Genome Res* 25:111-8.
- 489 25. Baines SL, Howden BP, Heffernan H, Stinear TP, Carter GP, Seemann T, Kwong JC, Ritchie SR,  
490 Williamson DA. 2016. Rapid Emergence and Evolution of *Staphylococcus aureus* Clones  
491 Harboring *fusC*-Containing Staphylococcal Cassette Chromosome Elements. *Antimicrob*  
492 *Agents Chemother* 60:2359-65.
- 493 26. Carver TJ, Rutherford, K. M., Berriman, M., Rajandream, M., Barrell, B. G., Parkhill, J. 2005.  
494 ACT: the Artemis comparison tool. *Bioinformatics Appl Notes* 21:3422-3423.
- 495 27. Bankevich A, Nurk S, Antipov D, Gurevich AA, Dvorkin M, Kulikov AS, Lesin VM, Nikolenko SI,  
496 Pham S, Pribelski AD, Pyshkin AV, Sirotkin AV, Vyahhi N, Tesler G, Alekseyev MA, Pevzner PA.  
497 2012. SPAdes: a new genome assembly algorithm and its applications to single-cell  
498 sequencing. *J Comput Biol* 19:455-77.
- 499 28. Seemann T. 2014. Prokka: rapid prokaryotic genome annotation. *Bioinformatics* 30:2068-9.

- 500 29. Page AJ, Cummins CA, Hunt M, Wong VK, Reuter S, Holden MT, Fookes M, Falush D, Keane JA,  
501 Parkhill J. 2015. Roary: rapid large-scale prokaryote pan genome analysis. *Bioinformatics*  
502 31:3691-3.
- 503 30. Nguyen LT, Schmidt HA, von Haeseler A, Minh BQ. 2015. IQ-TREE: a fast and effective  
504 stochastic algorithm for estimating maximum-likelihood phylogenies. *Mol Biol Evol* 32:268-  
505 74.
- 506 31. Didelot X, Wilson DJ. 2015. ClonalFrameML: efficient inference of recombination in whole  
507 bacterial genomes. *PLoS Comput Biol* 11:e1004041.
- 508 32. Bouckaert R, Heled J, Kuhnert D, Vaughan T, Wu CH, Xie D, Suchard MA, Rambaut A,  
509 Drummond AJ. 2014. BEAST 2: a software platform for Bayesian evolutionary analysis. *PLoS*  
510 *Comput Biol* 10:e1003537.
- 511 33. Gray RR, Tatem AJ, Johnson JA, Alekseyenko AV, Pybus OG, Suchard MA, Salemi M. 2011.  
512 Testing spatiotemporal hypothesis of bacterial evolution using methicillin-resistant  
513 *Staphylococcus aureus* ST239 genome-wide data within a bayesian framework. *Mol Biol Evol*  
514 28:1593-1603.
- 515 34. Purcell S, Neale B, Todd-Brown K, Thomas L, Ferreira MA, Bender D, Maller J, Sklar P, de Bakker  
516 PI, Daly MJ, Sham PC. 2007. PLINK: a tool set for whole-genome association and population-  
517 based linkage analyses. *Am J Hum Genet* 81:559-575.
- 518 35. Jombart T, Ahmed I. 2011. adegenet 1.3-1: new tools for the analysis of genome-wide SNP  
519 data. *Bioinformatics* 27:3070-1.
- 520 36. Mahairas GG, Lyon BR, Skurray RA, Pattee PA. 1989. Genetic analysis of *Staphylococcus aureus*  
521 with Tn4001. *J Bacteriol* 171:3968-72.
- 522 37. Lyon BR, Gillespie MT, Skurray RA. 1987. Detection and characterization of IS256, an insertion  
523 sequence in *Staphylococcus aureus*. *J Gen Microbiol* 133:3031-8.
- 524 38. Partridge SR, Kwong SM, Firth N, Jensen SO. 2018. Mobile Genetic Elements Associated with  
525 Antimicrobial Resistance. *Clin Microbiol Rev* 31.
- 526 39. Jombart T, Devillard S, Balloux F. 2010. Discriminant analysis of principal components: a new  
527 method for the analysis of genetically structured populations. *BMC Genet* 11:94.
- 528 40. Hardy K, Sunnucks K, Gil H, Shabir S, Trampani E, Hawkey P, Webber M. 2018. Increased Usage  
529 of Antiseptics Is Associated with Reduced Susceptibility in Clinical Isolates of *Staphylococcus*  
530 *aureus*. *MBio* 9.
- 531 41. Paulsen IT, Brown MH, Littlejohn TG, Mitchell BA, Skurray RA. 1996. Multidrug resistance  
532 proteins QacA and QacB from *Staphylococcus aureus*: membrane topology and identification  
533 of residues involved in substrate specificity. *Proc Natl Acad Sci U S A* 93:3630-5.
- 534 42. Horner C, Mawer D, Wilcox M. 2012. Reduced susceptibility to chlorhexidine in staphylococci:  
535 is it increasing and does it matter? *J Antimicrob Chemother* 67:2547-59.

536



**Supplementary Dataset**

|    | <b>ID</b>                 | <b>Year</b> | <b>Country</b> | <b>State (AUS)</b> | <b>Data Type</b> | <b>Sequence Platform</b>  | <b>Sample/Genome Accession</b> | <b>Run Accession</b> | <b>Sequence Reference</b>          |
|----|---------------------------|-------------|----------------|--------------------|------------------|---------------------------|--------------------------------|----------------------|------------------------------------|
| 1  | <b>BPH0468</b>            | 2005        | Australia      | QLD                | WGS Reads        | Illumina MiSeq            | SAMEA3212938                   | ERR732815            | Baines. 2015. mBio. PMID: 25736880 |
| 2  | <b>BPH0475</b>            | 2003        | Australia      | VIC                | WGS Reads        | Illumina MiSeq            | SAMEA3212931                   | ERR732816            | Baines. 2015. mBio. PMID: 25736880 |
| 3  | <b>BPH0488</b>            | 2003        | Australia      | VIC                | WGS Reads        | Illumina MiSeq            | SAMEA3212956                   | ERR732817            | Baines. 2015. mBio. PMID: 25736880 |
| 4  | <b>BPH0491</b>            | 2005        | Australia      | VIC                | WGS Reads        | Illumina MiSeq            | SAMEA3212955                   | ERR732818            | Baines. 2015. mBio. PMID: 25736880 |
| 5  | <b>BPH0494</b>            | 2005        | Australia      | QLD                | WGS Reads        | Illumina MiSeq            | SAMEA3212940                   | ERR732819            | Baines. 2015. mBio. PMID: 25736880 |
| 6  | <b>BPH0496</b>            | 2004        | Australia      | QLD                | WGS Reads        | Illumina MiSeq            | SAMEA3212928                   | ERR732820            | Baines. 2015. mBio. PMID: 25736880 |
| 7  | <b>BPH0499</b>            | 2005        | Australia      | VIC                | WGS Reads        | Illumina MiSeq            | SAMEA3212937                   | ERR732821            | Baines. 2015. mBio. PMID: 25736880 |
| 8  | <b>BPH0502</b>            | 2003        | Australia      | WA                 | WGS Reads        | Illumina MiSeq            | SAMEA3212919                   | ERR732822            | Baines. 2015. mBio. PMID: 25736880 |
| 9  | <b>BPH0503</b>            | 2003        | Australia      | VIC                | WGS Reads        | Illumina MiSeq            | SAMEA3212967                   | ERR732823            | Baines. 2015. mBio. PMID: 25736880 |
| 10 | <b>BPH0508</b>            | 2006        | Australia      | QLD                | WGS Reads        | Illumina MiSeq            | SAMEA3212893                   | ERR732824            | Baines. 2015. mBio. PMID: 25736880 |
| 11 | <b>BPH0509</b>            | 2005        | Australia      | QLD                | WGS Reads        | Illumina MiSeq            | SAMEA3212911                   | ERR732825            | Baines. 2015. mBio. PMID: 25736880 |
| 12 | <b>BPH0510</b>            | 2005        | Australia      | NSW                | WGS Reads        | Illumina MiSeq            | SAMEA3212957                   | ERR732826            | Baines. 2015. mBio. PMID: 25736880 |
| 13 | <b>BPH2002</b>            | 2002        | Australia      | VIC                | WGS Reads        | Illumina MiSeq            | SAMEA3212904                   | ERR732827            | Baines. 2015. mBio. PMID: 25736880 |
| 14 | <b>BPH2003</b>            | 2001        | Australia      | VIC                | WGS Reads        | Illumina MiSeq            | SAMEA3212913                   | ERR732828            | Baines. 2015. mBio. PMID: 25736880 |
| -  | <b>pBPH2003 (BPH2003)</b> | -           | -              | -                  | Complete Genome  | Pacific Biosciences RS-II | GCA_900607265                  | -                    | This Study                         |
| -  | <b>pBPH2003 (BPH2003)</b> | -           | -              | -                  | WGS Long Reads   | Pacific Biosciences RS-II | SAMEA5047398                   | ERR2858549           | This Study                         |
| 15 | <b>BPH2004</b>            | 2001        | Australia      | VIC                | WGS Reads        | Illumina MiSeq            | SAMEA3212949                   | ERR732829            | Baines. 2015. mBio. PMID: 25736880 |
| 16 | <b>BPH2005</b>            | 1999        | Australia      | VIC                | WGS Reads        | Illumina MiSeq            | SAMEA3212961                   | ERR732830            | Baines. 2015. mBio. PMID: 25736880 |
| 17 | <b>BPH2006</b>            | 2001        | Australia      | VIC                | WGS Reads        | Illumina MiSeq            | SAMEA3212925                   | ERR732831            | Baines. 2015. mBio. PMID: 25736880 |
| 18 | <b>BPH2007</b>            | 2001        | Australia      | VIC                | WGS Reads        | Illumina MiSeq            | SAMEA3212952                   | ERR732832            | Baines. 2015. mBio. PMID: 25736880 |
| 19 | <b>BPH2008</b>            | 2000        | Australia      | VIC                | WGS Reads        | Illumina MiSeq            | SAMEA3212918                   | ERR732833            | Baines. 2015. mBio. PMID: 25736880 |
| 20 | <b>BPH2009</b>            | 2000        | Australia      | VIC                | WGS Reads        | Illumina MiSeq            | SAMEA3212948                   | ERR732834            | Baines. 2015. mBio. PMID: 25736880 |
| 21 | <b>BPH2010</b>            | 2001        | Australia      | VIC                | WGS Reads        | Illumina MiSeq            | SAMEA3212899                   | ERR732835            | Baines. 2015. mBio. PMID: 25736880 |
| 22 | <b>BPH2011</b>            | 2001        | Australia      | VIC                | WGS Reads        | Illumina MiSeq            | SAMEA3212962                   | ERR732836            | Baines. 2015. mBio. PMID: 25736880 |
| 23 | <b>BPH2012</b>            | 1999        | Australia      | VIC                | WGS Reads        | Illumina MiSeq            | SAMEA3212958                   | ERR732837            | Baines. 2015. mBio. PMID: 25736880 |
| 24 | <b>BPH2013</b>            | 2004        | Australia      | VIC                | WGS Reads        | Illumina MiSeq            | SAMEA3212934                   | ERR732838            | Baines. 2015. mBio. PMID: 25736880 |
| 25 | <b>BPH2014</b>            | 1999        | Australia      | VIC                | WGS Reads        | Illumina MiSeq            | SAMEA3212969                   | ERR732839            | Baines. 2015. mBio. PMID: 25736880 |
| 26 | <b>BPH2015</b>            | 2004        | Australia      | VIC                | WGS Reads        | Illumina MiSeq            | SAMEA3212954                   | ERR732840            | Baines. 2015. mBio. PMID: 25736880 |
| 27 | <b>BPH2016</b>            | 2005        | Australia      | VIC                | WGS Reads        | Illumina MiSeq            | SAMEA3212908                   | ERR732841            | Baines. 2015. mBio. PMID: 25736880 |
| 28 | <b>BPH2017</b>            | 2005        | Australia      | VIC                | WGS Reads        | Illumina MiSeq            | SAMEA3212936                   | ERR732842            | Baines. 2015. mBio. PMID: 25736880 |
| 29 | <b>BPH2018</b>            | 2004        | Australia      | VIC                | WGS Reads        | Illumina MiSeq            | SAMEA3212942                   | ERR732843            | Baines. 2015. mBio. PMID: 25736880 |
| 30 | <b>BPH2019</b>            | 2005        | Australia      | VIC                | WGS Reads        | Illumina MiSeq            | SAMEA3212951                   | ERR732844            | Baines. 2015. mBio. PMID: 25736880 |
| -  | <b>SV3 (BPH2019)</b>      | -           | -              | -                  | Complete Genome  | Pacific Biosciences RS-II | GCA_900607255                  | -                    | This Study                         |
| -  | <b>SV3 (BPH2019)</b>      | -           | -              | -                  | WGS Long Reads   | Pacific Biosciences RS-II | SAMEA5047399                   | ERR2858550           | This Study                         |
| 31 | <b>BPH2021</b>            | 2004        | Australia      | VIC                | WGS Reads        | Illumina MiSeq            | SAMEA3212903                   | ERR732845            | Baines. 2015. mBio. PMID: 25736880 |
| 32 | <b>BPH2022</b>            | 2005        | Australia      | VIC                | WGS Reads        | Illumina MiSeq            | SAMEA3212945                   | ERR732846            | Baines. 2015. mBio. PMID: 25736880 |
| 33 | <b>BPH2023</b>            | 2006        | Australia      | VIC                | WGS Reads        | Illumina MiSeq            | SAMEA3212915                   | ERR732847            | Baines. 2015. mBio. PMID: 25736880 |
| 34 | <b>BPH2024</b>            | 2007        | Australia      | VIC                | WGS Reads        | Illumina MiSeq            | SAMEA3212944                   | ERR732848            | Baines. 2015. mBio. PMID: 25736880 |
| 35 | <b>BPH2029</b>            | 2009        | Australia      | VIC                | WGS Reads        | Illumina MiSeq            | SAMEA3212905                   | ERR732852            | Baines. 2015. mBio. PMID: 25736880 |
| 36 | <b>BPH2031</b>            | 2008        | Australia      | VIC                | WGS Reads        | Illumina MiSeq            | SAMEA3212965                   | ERR732853            | Baines. 2015. mBio. PMID: 25736880 |
| 37 | <b>BPH2032</b>            | 1998        | Australia      | VIC                | WGS Reads        | Illumina MiSeq            | SAMEA3212926                   | ERR732854            | Baines. 2015. mBio. PMID: 25736880 |
| 38 | <b>BPH2034</b>            | 2008        | Australia      | VIC                | WGS Reads        | Illumina MiSeq            | SAMEA3212917                   | ERR732856            | Baines. 2015. mBio. PMID: 25736880 |
| 39 | <b>BPH2054</b>            | 1980        | Australia      | VIC                | WGS Reads        | Illumina MiSeq            | SAMEA3212883                   | ERR732860            | Baines. 2015. mBio. PMID: 25736880 |
| 40 | <b>BPH2055</b>            | 1980        | Australia      | VIC                | WGS Reads        | Illumina MiSeq            | SAMEA3212885                   | ERR732861            | Baines. 2015. mBio. PMID: 25736880 |
| 41 | <b>BPH2056</b>            | 1981        | Australia      | VIC                | WGS Reads        | Illumina MiSeq            | SAMEA3212902                   | ERR732862            | Baines. 2015. mBio. PMID: 25736880 |
| -  | <b>SV1 (BPH2056)</b>      | -           | -              | -                  | Complete Genome  | Pacific Biosciences RS-II | GCA_900607305                  | -                    | This Study                         |
| -  | <b>SV1 (BPH2056)</b>      | -           | -              | -                  | WGS Long Reads   | Pacific Biosciences RS-II | SAMEA5047400                   | ERR2858551           | This Study                         |
| 42 | <b>BPH2057</b>            | 1981        | Australia      | VIC                | WGS Reads        | Illumina MiSeq            | SAMEA3212889                   | ERR732863            | Baines. 2015. mBio. PMID: 25736880 |

|    |                      |      |             |     |                 |                              |               |            |                                    |
|----|----------------------|------|-------------|-----|-----------------|------------------------------|---------------|------------|------------------------------------|
| 43 | <b>BPH2059</b>       | 1981 | Australia   | VIC | WGS Reads       | Illumina MiSeq               | SAMEA3212897  | ERR732864  | Baines. 2015. mBio. PMID: 25736880 |
| 44 | <b>BPH2068</b>       | 2009 | Australia   | VIC | WGS Reads       | Illumina MiSeq               | SAMEA3212906  | ERR732865  | Baines. 2015. mBio. PMID: 25736880 |
| 45 | <b>BPH2070</b>       | 1998 | Australia   | VIC | WGS Reads       | Illumina MiSeq               | SAMEA3212890  | ERR732866  | Baines. 2015. mBio. PMID: 25736880 |
| -  | <b>SV2 (BPH2070)</b> | -    | -           | -   | Complete Genome | Pacific Biosciences RS-II    | GCA_900607275 | -          | This Study                         |
| -  | <b>SV2 (BPH2070)</b> | -    | -           | -   | WGS Long Reads  | Pacific Biosciences RS-II    | SAMEA5047401  | ERR2858552 | This Study                         |
| 46 | <b>BPH2071</b>       | 1998 | Australia   | VIC | WGS Reads       | Illumina MiSeq               | SAMEA3212888  | ERR732867  | Baines. 2015. mBio. PMID: 25736880 |
| 47 | <b>BPH2072</b>       | 1982 | Australia   | NSW | WGS Reads       | Illumina MiSeq               | SAMEA3212947  | ERR732868  | Baines. 2015. mBio. PMID: 25736880 |
| 48 | <b>BPH2073</b>       | 1982 | Australia   | NSW | WGS Reads       | Illumina MiSeq               | SAMEA3212927  | ERR732869  | Baines. 2015. mBio. PMID: 25736880 |
| 49 | <b>BPH2075</b>       | 1982 | Australia   | NSW | WGS Reads       | Illumina MiSeq               | SAMEA3212896  | ERR732870  | Baines. 2015. mBio. PMID: 25736880 |
| 50 | <b>BPH2077</b>       | 1982 | Australia   | NSW | WGS Reads       | Illumina MiSeq               | SAMEA3212932  | ERR732871  | Baines. 2015. mBio. PMID: 25736880 |
| 51 | <b>BPH2078</b>       | 1982 | Australia   | NSW | WGS Reads       | Illumina MiSeq               | SAMEA3212950  | ERR732872  | Baines. 2015. mBio. PMID: 25736880 |
| 52 | <b>BPH2079</b>       | 1982 | Australia   | NSW | WGS Reads       | Illumina MiSeq               | SAMEA3212922  | ERR732873  | Baines. 2015. mBio. PMID: 25736880 |
| 53 | <b>BPH2080</b>       | 1982 | Australia   | NSW | WGS Reads       | Illumina MiSeq               | SAMEA3212929  | ERR732874  | Baines. 2015. mBio. PMID: 25736880 |
| 54 | <b>BPH2081</b>       | 1982 | Australia   | NSW | WGS Reads       | Illumina MiSeq               | SAMEA3212941  | ERR732875  | Baines. 2015. mBio. PMID: 25736880 |
| 55 | <b>BPH2082</b>       | 1982 | Australia   | NSW | WGS Reads       | Illumina MiSeq               | SAMEA3212920  | ERR732876  | Baines. 2015. mBio. PMID: 25736880 |
| 56 | <b>BPH2083</b>       | 1982 | Australia   | NSW | WGS Reads       | Illumina MiSeq               | SAMEA3212886  | ERR732877  | Baines. 2015. mBio. PMID: 25736880 |
| 57 | <b>BPH2084</b>       | 1982 | Australia   | NSW | WGS Reads       | Illumina MiSeq               | SAMEA3212892  | ERR732878  | Baines. 2015. mBio. PMID: 25736880 |
| 58 | <b>BPH2085</b>       | 1982 | Australia   | NSW | WGS Reads       | Illumina MiSeq               | SAMEA3212907  | ERR732879  | Baines. 2015. mBio. PMID: 25736880 |
| 59 | <b>BPH2086</b>       | 1982 | Australia   | NSW | WGS Reads       | Illumina MiSeq               | SAMEA3212900  | ERR732880  | Baines. 2015. mBio. PMID: 25736880 |
| 60 | <b>BPH2088</b>       | 1982 | Australia   | NSW | WGS Reads       | Illumina MiSeq               | SAMEA3212968  | ERR732881  | Baines. 2015. mBio. PMID: 25736880 |
| 61 | <b>BPH2090</b>       | 2012 | Australia   | VIC | WGS Reads       | Illumina MiSeq               | SAMEA3212943  | ERR732882  | Baines. 2015. mBio. PMID: 25736880 |
| 62 | <b>BPH2094</b>       | 1998 | Australia   | NSW | WGS Reads       | Ion Torrent PGM              | SAMEA3212946  | ERR732883  | Baines. 2015. mBio. PMID: 25736880 |
| 63 | <b>BPH2095</b>       | 2003 | Australia   | NSW | WGS Reads       | Ion Torrent PGM              | SAMEA3212887  | ERR732884  | Baines. 2015. mBio. PMID: 25736880 |
| 64 | <b>BPH2096</b>       | 2005 | Australia   | NSW | WGS Reads       | Ion Torrent PGM              | SAMEA3212923  | ERR732885  | Baines. 2015. mBio. PMID: 25736880 |
| 65 | <b>BPH2097</b>       | 2007 | Australia   | NSW | WGS Reads       | Ion Torrent PGM              | SAMEA3212939  | ERR732886  | Baines. 2015. mBio. PMID: 25736880 |
| 66 | <b>BPH2098</b>       | 2007 | Australia   | NSW | WGS Reads       | Ion Torrent PGM              | SAMEA3212884  | ERR732887  | Baines. 2015. mBio. PMID: 25736880 |
| 67 | <b>BPH2099</b>       | 2007 | Australia   | NSW | WGS Reads       | Ion Torrent PGM              | SAMEA3212933  | ERR732888  | Baines. 2015. mBio. PMID: 25736880 |
| 68 | <b>JKD6000</b>       | 2002 | Australia   | VIC | WGS Reads       | Illumina Genome Analyzer Iix | SAMEA3212909  | ERR732889  | Baines. 2015. mBio. PMID: 25736880 |
| 69 | <b>JKD6004</b>       | 2002 | Australia   | QLD | WGS Reads       | Illumina Genome Analyzer Iix | SAMEA3212901  | ERR732891  | Baines. 2015. mBio. PMID: 25736880 |
| 70 | <b>JKD6008</b>       | 2006 | New Zealand | -   | Complete Genome | Roache 454 GS20, SOLiD       | CP002120      | -          | Howden. 2010. JBact. PMID:20802046 |
| 71 | <b>JKD6009</b>       | 2003 | New Zealand | -   | WGS Reads       | Illumina Genome Analyzer Iix | SAMEA3212894  | ERR732894  | Baines. 2015. mBio. PMID: 25736880 |
| -  | <b>SV5 (JKD6009)</b> | -    | -           | -   | Complete Genome | Pacific Biosciences RS-II    | GCA_900607245 | -          | This Study                         |
| -  | <b>SV5 (JKD6009)</b> | -    | -           | -   | WGS Long Reads  | Pacific Biosciences RS-II    | SAMEA5047402  | ERR2858553 | This Study                         |
| 72 | <b>JKD6021</b>       | 2001 | Australia   | VIC | WGS Reads       | Illumina Genome Analyzer Iix | SAMEA3212953  | ERR732895  | Baines. 2015. mBio. PMID: 25736880 |
| 73 | <b>JKD6052</b>       | 2004 | Australia   | QLD | WGS Reads       | Illumina Genome Analyzer Iix | SAMEA3212916  | ERR732899  | Baines. 2015. mBio. PMID: 25736880 |
| 74 | <b>JKD6121</b>       | 2005 | Australia   | VIC | WGS Reads       | Illumina Genome Analyzer Iix | SAMEA3212963  | ERR732900  | Baines. 2015. mBio. PMID: 25736880 |
| 75 | <b>BPH2065</b>       | 1981 | Australia   | SA  | WGS Reads       | Illumina NextSeq 500         | SAMEA5042664  | ERR2855733 | This Study                         |
| 76 | <b>BPH2066</b>       | 1981 | Australia   | SA  | WGS Reads       | Illumina NextSeq 500         | SAMEA5042665  | ERR2855734 | This Study                         |
| 77 | <b>BPH2104</b>       | 1990 | Australia   | VIC | WGS Reads       | Illumina NextSeq 500         | SAMEA5042666  | ERR2855735 | This Study                         |
| 78 | <b>BPH2106</b>       | 1992 | Australia   | VIC | WGS Reads       | Illumina NextSeq 500         | SAMEA5042667  | ERR2855736 | This Study                         |
| 79 | <b>BPH2107</b>       | 1990 | Australia   | VIC | WGS Reads       | Illumina NextSeq 500         | SAMEA5042669  | ERR2855737 | This Study                         |
| 80 | <b>BPH2154</b>       | 1992 | Australia   | VIC | WGS Reads       | Illumina NextSeq 500         | SAMEA5042676  | ERR2855744 | This Study                         |
| 81 | <b>BPH2161</b>       | 1992 | Australia   | VIC | WGS Reads       | Illumina NextSeq 500         | SAMEA5042678  | ERR2855746 | This Study                         |
| 82 | <b>BPH2163</b>       | 1989 | Australia   | VIC | WGS Reads       | Illumina NextSeq 500         | SAMEA5042679  | ERR2855747 | This Study                         |
| 83 | <b>BPH2165</b>       | 1989 | Australia   | VIC | WGS Reads       | Illumina NextSeq 500         | SAMEA5042680  | ERR2855748 | This Study                         |
| 84 | <b>BPH2203</b>       | 1992 | Australia   | VIC | WGS Reads       | Illumina NextSeq 500         | SAMEA5042687  | ERR2855755 | This Study                         |
| 85 | <b>BPH2205</b>       | 1989 | Australia   | VIC | WGS Reads       | Illumina NextSeq 500         | SAMEA5042689  | ERR2855757 | This Study                         |
| 86 | <b>BPH2226</b>       | 1990 | Australia   | VIC | WGS Reads       | Illumina NextSeq 500         | SAMEA5042695  | ERR2855763 | This Study                         |
| 87 | <b>BPH2228</b>       | 1990 | Australia   | QLD | WGS Reads       | Illumina NextSeq 500         | SAMEA5042696  | ERR2855764 | This Study                         |
| 88 | <b>BPH2233</b>       | 1990 | Australia   | VIC | WGS Reads       | Illumina NextSeq 500         | SAMEA5042699  | ERR2855767 | This Study                         |
| 89 | <b>BPH2234</b>       | 1991 | Australia   | VIC | WGS Reads       | Illumina NextSeq 500         | SAMEA5042700  | ERR2855768 | This Study                         |

|     |                      |      |           |     |                 |                           |                |            |                        |
|-----|----------------------|------|-----------|-----|-----------------|---------------------------|----------------|------------|------------------------|
| 90  | <b>BPH2235</b>       | 1991 | Australia | VIC | WGS Reads       | Illumina NextSeq 500      | SAMEA5042701   | ERR2855769 | This Study             |
| 91  | <b>BPH2236</b>       | 1991 | Australia | VIC | WGS Reads       | Illumina NextSeq 500      | SAMEA5042702   | ERR2855770 | This Study             |
| 92  | <b>BPH2238</b>       | 1989 | Australia | VIC | WGS Reads       | Illumina NextSeq 500      | SAMEA5042703   | ERR2855771 | This Study             |
| 93  | <b>BPH2710</b>       | 2011 | Australia | VIC | WGS Reads       | Illumina MiSeq            | SAMEA104317322 | ERR2137022 | Publication in process |
| 94  | <b>BPH2718</b>       | 2011 | Australia | VIC | WGS Reads       | Illumina MiSeq            | SAMEA104317330 | ERR2137030 | Publication in process |
| 95  | <b>BPH2723</b>       | 2011 | Australia | VIC | WGS Reads       | Illumina MiSeq            | SAMEA104317335 | ERR2137035 | Publication in process |
| 96  | <b>BPH2726</b>       | 2011 | Australia | VIC | WGS Reads       | Illumina MiSeq            | SAMEA104317338 | ERR2137038 | Publication in process |
| 97  | <b>BPH2747</b>       | 2011 | Australia | VIC | WGS Reads       | Illumina MiSeq            | SAMEA104317359 | ERR2137059 | Publication in process |
| 98  | <b>BPH2779</b>       | 2011 | Australia | VIC | WGS Reads       | Illumina HiSeq            | SAMEA104317390 | ERR2137090 | Publication in process |
| 99  | <b>BPH2780</b>       | 2011 | Australia | VIC | WGS Reads       | Illumina HiSeq            | SAMEA104317391 | ERR2137091 | Publication in process |
| 100 | <b>BPH2781</b>       | 2011 | Australia | VIC | WGS Reads       | Illumina HiSeq            | SAMEA104317392 | ERR2137092 | Publication in process |
| 101 | <b>BPH2787</b>       | 2011 | Australia | NSW | WGS Reads       | Illumina MiSeq            | SAMEA104317398 | ERR2137098 | Publication in process |
| 102 | <b>BPH2798</b>       | 2011 | Australia | VIC | WGS Reads       | Illumina HiSeq            | SAMEA104317409 | ERR2137109 | Publication in process |
| 103 | <b>BPH2824</b>       | 2011 | Australia | VIC | WGS Reads       | Illumina HiSeq            | SAMEA104317431 | ERR2137131 | Publication in process |
| 104 | <b>BPH2827</b>       | 2011 | Australia | NSW | WGS Reads       | Illumina MiSeq            | SAMEA104317434 | ERR2137134 | Publication in process |
| 105 | <b>BPH2869</b>       | 2012 | Australia | NSW | WGS Reads       | Illumina MiSeq            | SAMEA104317472 | ERR2137172 | Publication in process |
| -   | <b>SV6 (BPH2869)</b> | -    | -         | -   | Complete Genome | Pacific Biosciences RS-II | GCA_900607295  | -          | This Study             |
| -   | <b>SV6 (BPH2869)</b> | -    | -         | -   | WGS Long Reads  | Pacific Biosciences RS-II | SAMEA104317472 | ERR2858554 | This Study             |
| 106 | <b>BPH2896</b>       | 2012 | Australia | VIC | WGS Reads       | Illumina MiSeq            | SAMEA104317497 | ERR2137197 | Publication in process |
| 107 | <b>BPH2946</b>       | 2012 | Australia | VIC | WGS Reads       | Illumina MiSeq            | SAMEA104317543 | ERR2137243 | Publication in process |
| 108 | <b>BPH2947</b>       | 2012 | Australia | VIC | WGS Reads       | Illumina MiSeq            | SAMEA104317544 | ERR2137244 | Publication in process |
| 109 | <b>BPH3202</b>       | 2008 | Australia | QLD | WGS Reads       | Illumina NextSeq 500      | SAMEA104317594 | ERR2137294 | Publication in process |
| 110 | <b>BPH3208</b>       | 2007 | Australia | QLD | WGS Reads       | Illumina NextSeq 500      | SAMEA104317600 | ERR2137300 | Publication in process |
| 111 | <b>BPH3220</b>       | 2008 | Australia | QLD | WGS Reads       | Illumina NextSeq 500      | SAMEA104317612 | ERR2137312 | Publication in process |
| 112 | <b>BPH3234</b>       | 2008 | Australia | QLD | WGS Reads       | Illumina NextSeq 500      | SAMEA104317626 | ERR2137326 | Publication in process |
| 113 | <b>BPH3244</b>       | 2007 | Australia | QLD | WGS Reads       | Illumina NextSeq 500      | SAMEA104317636 | ERR2137336 | Publication in process |
| -   | <b>SV4 (BPH3244)</b> | -    | -         | -   | Complete Genome | Pacific Biosciences RS-II | GCA_900607285  | -          | This Study             |
| -   | <b>SV4 (BPH3244)</b> | -    | -         | -   | WGS Long Reads  | Pacific Biosciences RS-II | SAMEA104317636 | ERR2858555 | This Study             |
| 114 | <b>BPH3250</b>       | 2007 | Australia | QLD | WGS Reads       | Illumina NextSeq 500      | SAMEA104317642 | ERR2137342 | Publication in process |
| 115 | <b>BPH3254</b>       | 2008 | Australia | QLD | WGS Reads       | Illumina NextSeq 500      | SAMEA104317646 | ERR2137346 | Publication in process |
| 116 | <b>BPH3260</b>       | 2007 | Australia | QLD | WGS Reads       | Illumina NextSeq 500      | SAMEA104317652 | ERR2137352 | Publication in process |
| 117 | <b>BPH3262</b>       | 2008 | Australia | QLD | WGS Reads       | Illumina NextSeq 500      | SAMEA104317654 | ERR2137354 | Publication in process |
| 118 | <b>BPH3266</b>       | 2008 | Australia | QLD | WGS Reads       | Illumina NextSeq 500      | SAMEA104317658 | ERR2137358 | Publication in process |
| 119 | <b>BPH3272</b>       | 2007 | Australia | QLD | WGS Reads       | Illumina NextSeq 500      | SAMEA104317664 | ERR2137364 | Publication in process |
| 120 | <b>BPH3276</b>       | 2008 | Australia | QLD | WGS Reads       | Illumina NextSeq 500      | SAMEA104317668 | ERR2137368 | Publication in process |
| 121 | <b>BPH3284</b>       | 2008 | Australia | QLD | WGS Reads       | Illumina NextSeq 500      | SAMEA104317676 | ERR2137376 | Publication in process |
| 122 | <b>BPH3306</b>       | 2007 | Australia | QLD | WGS Reads       | Illumina NextSeq 500      | SAMEA104317698 | ERR2137398 | Publication in process |
| 123 | <b>BPH3324</b>       | 2008 | Australia | VIC | WGS Reads       | Illumina NextSeq 500      | SAMEA104317716 | ERR2137416 | Publication in process |
| 124 | <b>BPH3328</b>       | 2008 | Australia | VIC | WGS Reads       | Illumina NextSeq 500      | SAMEA104317720 | ERR2137420 | Publication in process |
| 125 | <b>BPH3332</b>       | 2008 | Australia | VIC | WGS Reads       | Illumina NextSeq 500      | SAMEA104317724 | ERR2137424 | Publication in process |
| 126 | <b>BPH3344</b>       | 2008 | Australia | VIC | WGS Reads       | Illumina NextSeq 500      | SAMEA104317736 | ERR2137436 | Publication in process |
| 127 | <b>BPH3346</b>       | 2008 | Australia | VIC | WGS Reads       | Illumina NextSeq 500      | SAMEA104317738 | ERR2137438 | Publication in process |
| 128 | <b>BPH3348</b>       | 2007 | Australia | VIC | WGS Reads       | Illumina NextSeq 500      | SAMEA104317740 | ERR2137440 | Publication in process |
| 129 | <b>BPH3356</b>       | 2007 | Australia | VIC | WGS Reads       | Illumina NextSeq 500      | SAMEA104317748 | ERR2137448 | Publication in process |
| 130 | <b>BPH3360</b>       | 2008 | Australia | VIC | WGS Reads       | Illumina NextSeq 500      | SAMEA104317752 | ERR2137452 | Publication in process |
| 131 | <b>BPH3362</b>       | 2008 | Australia | VIC | WGS Reads       | Illumina NextSeq 500      | SAMEA104317754 | ERR2137454 | Publication in process |
| 132 | <b>BPH3366</b>       | 2008 | Australia | VIC | WGS Reads       | Illumina NextSeq 500      | SAMEA104317758 | ERR2137458 | Publication in process |
| 133 | <b>BPH3368</b>       | 2008 | Australia | VIC | WGS Reads       | Illumina NextSeq 500      | SAMEA104317760 | ERR2137460 | Publication in process |
| 134 | <b>BPH3370</b>       | 2008 | Australia | VIC | WGS Reads       | Illumina NextSeq 500      | SAMEA104317762 | ERR2137462 | Publication in process |
| 135 | <b>BPH3372</b>       | 2008 | Australia | VIC | WGS Reads       | Illumina NextSeq 500      | SAMEA104317764 | ERR2137464 | Publication in process |
| 136 | <b>BPH3376</b>       | 2007 | Australia | VIC | WGS Reads       | Illumina NextSeq 500      | SAMEA104317768 | ERR2137468 | Publication in process |



|     |                |      |           |     |           |                      |                |            |                        |
|-----|----------------|------|-----------|-----|-----------|----------------------|----------------|------------|------------------------|
| 188 | <b>BPH3662</b> | 2007 | Australia | NSW | WGS Reads | Illumina NextSeq 500 | SAMEA104325216 | ERR2145175 | Publication in process |
| 189 | <b>BPH3664</b> | 2008 | Australia | NSW | WGS Reads | Illumina NextSeq 500 | SAMEA104325218 | ERR2145177 | Publication in process |
| 190 | <b>BPH3666</b> | 2007 | Australia | NSW | WGS Reads | Illumina NextSeq 500 | SAMEA104325220 | ERR2145179 | Publication in process |
| 191 | <b>BPH3668</b> | 2007 | Australia | NSW | WGS Reads | Illumina NextSeq 500 | SAMEA104325222 | ERR2145181 | Publication in process |
| 192 | <b>BPH3670</b> | 2008 | Australia | NSW | WGS Reads | Illumina NextSeq 500 | SAMEA104325224 | ERR2145183 | Publication in process |
| 193 | <b>BPH3672</b> | 2007 | Australia | NSW | WGS Reads | Illumina NextSeq 500 | SAMEA104325226 | ERR2145185 | Publication in process |
| 194 | <b>BPH3674</b> | 2008 | Australia | NSW | WGS Reads | Illumina NextSeq 500 | SAMEA104325228 | ERR2145187 | Publication in process |
| 195 | <b>BPH3676</b> | 2007 | Australia | NSW | WGS Reads | Illumina NextSeq 500 | SAMEA104325230 | ERR2145189 | Publication in process |
| 196 | <b>BPH3678</b> | 2008 | Australia | NSW | WGS Reads | Illumina NextSeq 500 | SAMEA104325232 | ERR2145191 | Publication in process |
| 197 | <b>BPH3680</b> | 2007 | Australia | NSW | WGS Reads | Illumina NextSeq 500 | SAMEA104325234 | ERR2145193 | Publication in process |
| 198 | <b>BPH3682</b> | 2007 | Australia | NSW | WGS Reads | Illumina NextSeq 500 | SAMEA104325236 | ERR2145195 | Publication in process |
| 199 | <b>BPH3684</b> | 2007 | Australia | NSW | WGS Reads | Illumina NextSeq 500 | SAMEA104325238 | ERR2145197 | Publication in process |
| 200 | <b>BPH3686</b> | 2008 | Australia | NSW | WGS Reads | Illumina NextSeq 500 | SAMEA104325240 | ERR2145199 | Publication in process |
| 201 | <b>BPH3688</b> | 2008 | Australia | NSW | WGS Reads | Illumina NextSeq 500 | SAMEA104325242 | ERR2145201 | Publication in process |
| 202 | <b>BPH3692</b> | 2007 | Australia | NSW | WGS Reads | Illumina NextSeq 500 | SAMEA104325246 | ERR2145205 | Publication in process |
| 203 | <b>BPH3694</b> | 2007 | Australia | NSW | WGS Reads | Illumina NextSeq 500 | SAMEA104325248 | ERR2145207 | Publication in process |
| 204 | <b>BPH3696</b> | 2008 | Australia | NSW | WGS Reads | Illumina NextSeq 500 | SAMEA104325250 | ERR2145209 | Publication in process |
| 205 | <b>BPH3698</b> | 2008 | Australia | NSW | WGS Reads | Illumina NextSeq 500 | SAMEA104325252 | ERR2145211 | Publication in process |
| 206 | <b>BPH3700</b> | 2007 | Australia | NSW | WGS Reads | Illumina NextSeq 500 | SAMEA104325254 | ERR2145213 | Publication in process |
| 207 | <b>BPH3702</b> | 2007 | Australia | NSW | WGS Reads | Illumina NextSeq 500 | SAMEA104325256 | ERR2145215 | Publication in process |
| 208 | <b>BPH3704</b> | 2008 | Australia | NSW | WGS Reads | Illumina NextSeq 500 | SAMEA104325258 | ERR2145217 | Publication in process |
| 209 | <b>BPH3706</b> | 2008 | Australia | NSW | WGS Reads | Illumina NextSeq 500 | SAMEA104325260 | ERR2145219 | Publication in process |
| 210 | <b>BPH3708</b> | 2007 | Australia | NSW | WGS Reads | Illumina NextSeq 500 | SAMEA104325262 | ERR2145221 | Publication in process |
| 211 | <b>BPH3710</b> | 2008 | Australia | NSW | WGS Reads | Illumina NextSeq 500 | SAMEA104325264 | ERR2145223 | Publication in process |
| 212 | <b>BPH3712</b> | 2007 | Australia | NSW | WGS Reads | Illumina NextSeq 500 | SAMEA104325266 | ERR2145225 | Publication in process |

#### Additional WGS Data

|     |                |      |           |     |           |                              |              |            |                                    |
|-----|----------------|------|-----------|-----|-----------|------------------------------|--------------|------------|------------------------------------|
| 213 | <b>JKD6001</b> | 2003 | Australia | VIC | WGS Reads | Illumina Genome Analyzer Iix | SAMEA3212898 | ERR732890  | Baines. 2015. mBio. PMID: 25736880 |
| 214 | <b>JKD6005</b> | 2002 | Australia | QLD | WGS Reads | Illumina Genome Analyzer Iix | SAMEA3212895 | ERR732892  | Baines. 2015. mBio. PMID: 25736880 |
| 215 | <b>JKD6007</b> | 2002 | Australia | QLD | WGS Reads | Illumina MiSeq               | SAMEA3212912 | ERR732893  | Baines. 2015. mBio. PMID: 25736880 |
| 216 | <b>JKD6022</b> | 2001 | Australia | VIC | WGS Reads | Illumina MiSeq               | SAMEA3212914 | ERR732896  | Baines. 2015. mBio. PMID: 25736880 |
| 217 | <b>JKD6023</b> | 2001 | Australia | VIC | WGS Reads | Illumina Genome Analyzer Iix | SAMEA3212964 | ERR732897  | Baines. 2015. mBio. PMID: 25736880 |
| 218 | <b>JKD6051</b> | 2003 | Australia | QLD | WGS Reads | Illumina Genome Analyzer Iix | SAMEA3212960 | ERR732898  | Baines. 2015. mBio. PMID: 25736880 |
| 219 | <b>BPH2108</b> | 1990 | Australia | VIC | WGS Reads | Illumina NextSeq 500         | SAMEA5042670 | ERR2855738 | This Study                         |
| 220 | <b>BPH2109</b> | 1989 | Australia | VIC | WGS Reads | Illumina NextSeq 500         | SAMEA5042671 | ERR2855739 | This Study                         |
| 221 | <b>BPH2113</b> | 1990 | Australia | VIC | WGS Reads | Illumina NextSeq 500         | SAMEA5042672 | ERR2855740 | This Study                         |
| 222 | <b>BPH2119</b> | 1991 | Australia | VIC | WGS Reads | Illumina NextSeq 500         | SAMEA5042673 | ERR2855741 | This Study                         |
| 223 | <b>BPH2120</b> | 1990 | Australia | VIC | WGS Reads | Illumina NextSeq 500         | SAMEA5042674 | ERR2855742 | This Study                         |
| 224 | <b>BPH2139</b> | 1992 | Australia | VIC | WGS Reads | Illumina NextSeq 500         | SAMEA5042675 | ERR2855743 | This Study                         |
| 225 | <b>BPH2157</b> | 1992 | Australia | VIC | WGS Reads | Illumina NextSeq 500         | SAMEA5042677 | ERR2855745 | This Study                         |
| 226 | <b>BPH2167</b> | 1990 | Australia | VIC | WGS Reads | Illumina NextSeq 500         | SAMEA5042681 | ERR2855749 | This Study                         |
| 227 | <b>BPH2168</b> | 1990 | Australia | VIC | WGS Reads | Illumina NextSeq 500         | SAMEA5042682 | ERR2855750 | This Study                         |
| 228 | <b>BPH2196</b> | 1989 | Australia | VIC | WGS Reads | Illumina NextSeq 500         | SAMEA5042683 | ERR2855751 | This Study                         |
| 229 | <b>BPH2198</b> | 1989 | Australia | VIC | WGS Reads | Illumina NextSeq 500         | SAMEA5042684 | ERR2855752 | This Study                         |
| 230 | <b>BPH2199</b> | 1989 | Australia | VIC | WGS Reads | Illumina NextSeq 500         | SAMEA5042685 | ERR2855753 | This Study                         |
| 231 | <b>BPH2202</b> | 1990 | Australia | VIC | WGS Reads | Illumina NextSeq 500         | SAMEA5042686 | ERR2855754 | This Study                         |
| 232 | <b>BPH2204</b> | 1990 | Australia | VIC | WGS Reads | Illumina NextSeq 500         | SAMEA5042688 | ERR2855756 | This Study                         |
| 233 | <b>BPH2207</b> | 1990 | Australia | VIC | WGS Reads | Illumina NextSeq 500         | SAMEA5042690 | ERR2855758 | This Study                         |
| 234 | <b>BPH2210</b> | 1990 | Australia | VIC | WGS Reads | Illumina NextSeq 500         | SAMEA5042691 | ERR2855759 | This Study                         |
| 235 | <b>BPH2213</b> | 1991 | Australia | VIC | WGS Reads | Illumina NextSeq 500         | SAMEA5042692 | ERR2855760 | This Study                         |
| 236 | <b>BPH2219</b> | 1991 | Australia | TAS | WGS Reads | Illumina NextSeq 500         | SAMEA5042693 | ERR2855761 | This Study                         |
| 237 | <b>BPH2222</b> | 1991 | Australia | VIC | WGS Reads | Illumina NextSeq 500         | SAMEA5042694 | ERR2855762 | This Study                         |

|     |                    |      |                |     |                  |                          |                              |            |                                           |
|-----|--------------------|------|----------------|-----|------------------|--------------------------|------------------------------|------------|-------------------------------------------|
| 238 | <b>BPH2230</b>     | 1991 | Australia      | VIC | WGS Reads        | Illumina NextSeq 500     | SAMEA5042697                 | ERR2855765 | This Study                                |
| 239 | <b>BPH2232</b>     | 1991 | Australia      | VIC | WGS Reads        | Illumina NextSeq 500     | SAMEA5042698                 | ERR2855766 | This Study                                |
| 240 | <b>BPH2240</b>     | 1989 | Australia      | VIC | WGS Reads        | Illumina NextSeq 500     | SAMEA5042704                 | ERR2855772 | This Study                                |
| 241 | <b>BPH2242</b>     | 1989 | Australia      | VIC | WGS Reads        | Illumina NextSeq 500     | SAMEA5042705                 | ERR2855773 | This Study                                |
| 242 | <b>BPH2243</b>     | 1989 | Australia      | VIC | WGS Reads        | Illumina NextSeq 500     | SAMEA5042706                 | ERR2855774 | This Study                                |
| 243 | <b>S20209-2015</b> | 2015 | Australia      | NSW | WGS Reads        | Illumina MiSeq           | -                            | -          | agargroup.org.au/agar-surveys             |
| 244 | <b>S20305-2015</b> | 2015 | Australia      | NSW | WGS Reads        | Illumina MiSeq           | -                            | -          | agargroup.org.au/agar-surveys             |
| 245 | <b>S20603-2015</b> | 2015 | Australia      | NSW | WGS Reads        | Illumina MiSeq           | -                            | -          | agargroup.org.au/agar-surveys             |
| 246 | <b>S20607-2015</b> | 2015 | Australia      | NSW | WGS Reads        | Illumina MiSeq           | -                            | -          | agargroup.org.au/agar-surveys             |
| 247 | <b>S20608-2015</b> | 2015 | Australia      | NSW | WGS Reads        | Illumina MiSeq           | -                            | -          | agargroup.org.au/agar-surveys             |
| 248 | <b>S20610-2015</b> | 2015 | Australia      | NSW | WGS Reads        | Illumina MiSeq           | -                            | -          | agargroup.org.au/agar-surveys             |
| 249 | <b>S20613-2015</b> | 2015 | Australia      | NSW | WGS Reads        | Illumina MiSeq           | -                            | -          | agargroup.org.au/agar-surveys             |
| 250 | <b>S20617-2015</b> | 2015 | Australia      | NSW | WGS Reads        | Illumina MiSeq           | -                            | -          | agargroup.org.au/agar-surveys             |
| 251 | <b>S20622-2015</b> | 2015 | Australia      | NSW | WGS Reads        | Illumina MiSeq           | -                            | -          | agargroup.org.au/agar-surveys             |
| 252 | <b>S20623-2015</b> | 2015 | Australia      | NSW | WGS Reads        | Illumina MiSeq           | -                            | -          | agargroup.org.au/agar-surveys             |
| 253 | <b>S20629-2015</b> | 2015 | Australia      | NSW | WGS Reads        | Illumina MiSeq           | -                            | -          | agargroup.org.au/agar-surveys             |
| 254 | <b>S20826-2015</b> | 2015 | Australia      | NSW | WGS Reads        | Illumina MiSeq           | -                            | -          | agargroup.org.au/agar-surveys             |
| 255 | <b>S23616-2015</b> | 2015 | Australia      | NSW | WGS Reads        | Illumina MiSeq           | -                            | -          | agargroup.org.au/agar-surveys             |
| 256 | <b>S23619-2015</b> | 2015 | Australia      | NSW | WGS Reads        | Illumina MiSeq           | -                            | -          | agargroup.org.au/agar-surveys             |
| 257 | <b>S31902-2015</b> | 2015 | Australia      | VIC | WGS Reads        | Illumina MiSeq           | -                            | -          | agargroup.org.au/agar-surveys             |
| 258 | <b>S31904-2015</b> | 2015 | Australia      | VIC | WGS Reads        | Illumina MiSeq           | -                            | -          | agargroup.org.au/agar-surveys             |
| 259 | <b>S31913-2015</b> | 2015 | Australia      | VIC | WGS Reads        | Illumina MiSeq           | -                            | -          | agargroup.org.au/agar-surveys             |
| 260 | <b>S31918-2015</b> | 2015 | Australia      | VIC | WGS Reads        | Illumina MiSeq           | -                            | -          | agargroup.org.au/agar-surveys             |
| 261 | <b>S32313-2015</b> | 2015 | Australia      | VIC | WGS Reads        | Illumina MiSeq           | -                            | -          | agargroup.org.au/agar-surveys             |
| 262 | <b>S41210-2015</b> | 2015 | Australia      | QLD | WGS Reads        | Illumina MiSeq           | -                            | -          | agargroup.org.au/agar-surveys             |
| 263 | <b>S51001-2015</b> | 2015 | Australia      | NT  | WGS Reads        | Illumina MiSeq           | -                            | -          | agargroup.org.au/agar-surveys             |
| 264 | <b>S51003-2015</b> | 2015 | Australia      | NT  | WGS Reads        | Illumina MiSeq           | -                            | -          | agargroup.org.au/agar-surveys             |
| 265 | <b>S51006-2015</b> | 2015 | Australia      | NT  | WGS Reads        | Illumina MiSeq           | -                            | -          | agargroup.org.au/agar-surveys             |
| 266 | <b>S51007-2015</b> | 2015 | Australia      | NT  | WGS Reads        | Illumina MiSeq           | -                            | -          | agargroup.org.au/agar-surveys             |
| 267 | <b>S51008-2015</b> | 2015 | Australia      | NT  | WGS Reads        | Illumina MiSeq           | -                            | -          | agargroup.org.au/agar-surveys             |
| 268 | <b>S51014-2015</b> | 2015 | Australia      | NT  | WGS Reads        | Illumina MiSeq           | -                            | -          | agargroup.org.au/agar-surveys             |
| 269 | <b>S51024-2015</b> | 2015 | Australia      | NT  | WGS Reads        | Illumina MiSeq           | -                            | -          | agargroup.org.au/agar-surveys             |
| 270 | <b>S51408-2015</b> | 2015 | Australia      | SA  | WGS Reads        | Illumina MiSeq           | -                            | -          | agargroup.org.au/agar-surveys             |
| 271 | <b>S51504-2015</b> | 2015 | Australia      | SA  | WGS Reads        | Illumina MiSeq           | -                            | -          | agargroup.org.au/agar-surveys             |
| 272 | <b>TW20</b>        | 2003 | United Kingdom | -   | Complete Genomes | -                        | FN433596, FN433597, FN433598 | -          | Holden. 2010. JBact. PMID:19948800        |
| 273 | <b>Z172</b>        | 2010 | Taiwan         | -   | Complete Genomes | Illumina/Solexa + PacBio | CP006838, CP006839, CP006840 | -          | Chen. 2013. GenomeA. PMID:PMC3853063      |
| 274 | <b>T0131</b>       | 2006 | China          | -   | Complete Genomes | Roche 454 / Solexa       | CP002643                     | -          | Li. 2011. JBact. PMID:21551295            |
| 275 | <b>BMB9393</b>     | 1993 | Brazil         | -   | Complete Genome  | 454 GS FLX Titanium      | CP005288, CP005289           | -          | Costa. 2013. GenomeA. PMID:23929475       |
| 276 | <b>XN108</b>       | -    | China          | -   | Complete Genomes | Ion Torrent PGM          | CP007447                     | -          | Zhang. 2014. GenomeA. PMID:25059856       |
| 277 | <b>GV69</b>        | 1996 | Brazil         | -   | Complete Genomes | 454 GS FLX Titanium      | CP009681; SAMN03144721       | SRR2601051 | Botelho. 2016. StandGenSci. PMID:27152133 |
| 278 | <b>HCI1335</b>     | 2001 | Brazil         | -   | Complete Genomes | 454 GS FLX Titanium      | CP012012                     | -          | Botelho. 2016. GenBioEvol. PMID:27635055  |
| 279 | <b>M92</b>         | -    | Canada         | -   | Complete Genomes | PacBio RS-II             | CP015447                     | -          | McClure. 2017. GenomeA. PMID:28596402     |
| 280 | <b>2A8</b>         | 2001 | Czech Republic | -   | WGS Reads        | Illumina HiSeq 2000      | SAMEA1029549                 | ERR064912  | Castillo-Ramirez. 2012. GB. PMID:23270620 |
| 281 | <b>3HK</b>         | 2000 | Czech Republic | -   | WGS Reads        | Illumina HiSeq 2000      | SAMEA1029566                 | ERR064907  | Castillo-Ramirez. 2012. GB. PMID:23270620 |
| 282 | <b>AGT1</b>        | 1997 | Argentina      | -   | WGS Reads        | Illumina HiSeq 2000      | SAMEA1029527                 | ERR064926  | Castillo-Ramirez. 2012. GB. PMID:23270620 |
| 283 | <b>AGT9</b>        | 1997 | Argentina      | -   | WGS Reads        | Illumina HiSeq 2000      | SAMEA1029509                 | ERR064923  | Castillo-Ramirez. 2012. GB. PMID:23270620 |
| 284 | <b>AGT67</b>       | 1997 | Argentina      | -   | WGS Reads        | Illumina HiSeq 2000      | SAMEA1029555                 | ERR064924  | Castillo-Ramirez. 2012. GB. PMID:23270620 |
| 285 | <b>AGT120</b>      | 1998 | Argentina      | -   | WGS Reads        | Illumina HiSeq 2000      | SAMEA1029554                 | ERR064919  | Castillo-Ramirez. 2012. GB. PMID:23270620 |
| 286 | <b>ANS46</b>       | 1982 | Australia      | -   | WGS Reads        | Illumina HiSeq 2000      | SAMEA1029537                 | ERR064898  | Castillo-Ramirez. 2012. GB. PMID:23270620 |
| 287 | <b>BK2421</b>      | 1996 | United States  | -   | WGS Reads        | Illumina HiSeq 2000      | SAMEA1029510                 | ERR064899  | Castillo-Ramirez. 2012. GB. PMID:23270620 |
| 288 | <b>BRA2</b>        | 1997 | Brazil         | -   | WGS Reads        | Illumina HiSeq 2000      | SAMEA1029514                 | ERR064914  | Castillo-Ramirez. 2012. GB. PMID:23270620 |

|     |               |      |          |   |           |                             |              |           |                                           |
|-----|---------------|------|----------|---|-----------|-----------------------------|--------------|-----------|-------------------------------------------|
| 289 | <b>BRA36</b>  | 1997 | Brazil   | - | WGS Reads | Illumina HiSeq 2000         | SAMEA1029559 | ERR064917 | Castillo-Ramirez. 2012. GB. PMID:23270620 |
| 290 | <b>BZ48</b>   | 1997 | Brazil   | - | WGS Reads | Illumina HiSeq 2000         | SAMEA1029508 | ERR064918 | Castillo-Ramirez. 2012. GB. PMID:23270620 |
| 291 | <b>CHI59</b>  | 1998 | China    | - | WGS Reads | Illumina HiSeq 2000         | SAMEA1029524 | ERR064937 | Castillo-Ramirez. 2012. GB. PMID:23270620 |
| 292 | <b>CHI61</b>  | 1998 | China    | - | WGS Reads | Illumina HiSeq 2000         | SAMEA1029538 | ERR064938 | Castillo-Ramirez. 2012. GB. PMID:23270620 |
| 293 | <b>CHL1</b>   | 1997 | Chile    | - | WGS Reads | Illumina HiSeq 2000         | SAMEA1029526 | ERR064915 | Castillo-Ramirez. 2012. GB. PMID:23270620 |
| 294 | <b>CHL151</b> | 1998 | Chile    | - | WGS Reads | Illumina HiSeq 2000         | SAMEA1029539 | ERR064916 | Castillo-Ramirez. 2012. GB. PMID:23270620 |
| 295 | <b>D71</b>    | 1996 | Germany  | - | WGS Reads | Illumina Genome Analyzer II | SAMEA862562  | ERR024980 | Castillo-Ramirez. 2012. GB. PMID:23270620 |
| 296 | <b>D90</b>    | 1996 | Germany  | - | WGS Reads | Illumina Genome Analyzer II | SAMEA862585  | ERR025801 | Castillo-Ramirez. 2012. GB. PMID:23270620 |
| 297 | <b>DEN907</b> | 2001 | Denmark  | - | WGS Reads | Illumina HiSeq 2000         | SAMEA1029548 | ERR064948 | Castillo-Ramirez. 2012. GB. PMID:23270620 |
| 298 | <b>DEU2</b>   | 2009 | Turkey   | - | WGS Reads | Illumina Genome Analyzer II | SAMEA862577  | ERR026652 | Castillo-Ramirez. 2012. GB. PMID:23270620 |
| 299 | <b>DEU3</b>   | 2009 | Turkey   | - | WGS Reads | Illumina Genome Analyzer II | SAMEA862574  | ERR026653 | Castillo-Ramirez. 2012. GB. PMID:23270620 |
| 300 | <b>DEU5</b>   | 2009 | Turkey   | - | WGS Reads | Illumina Genome Analyzer II | SAMEA862580  | ERR026655 | Castillo-Ramirez. 2012. GB. PMID:23270620 |
| 301 | <b>DEU6</b>   | 2009 | Turkey   | - | WGS Reads | Illumina Genome Analyzer II | SAMEA862581  | ERR026656 | Castillo-Ramirez. 2012. GB. PMID:23270620 |
| 302 | <b>DEU8</b>   | 2009 | Turkey   | - | WGS Reads | Illumina Genome Analyzer II | SAMEA862579  | ERR026658 | Castillo-Ramirez. 2012. GB. PMID:23270620 |
| 303 | <b>DEU10</b>  | 2009 | Turkey   | - | WGS Reads | Illumina Genome Analyzer II | SAMEA862583  | ERR026649 | Castillo-Ramirez. 2012. GB. PMID:23270620 |
| 304 | <b>DEU11</b>  | 2009 | Turkey   | - | WGS Reads | Illumina Genome Analyzer II | SAMEA862554  | ERR026650 | Castillo-Ramirez. 2012. GB. PMID:23270620 |
| 305 | <b>DEU12</b>  | 2009 | Turkey   | - | WGS Reads | Illumina Genome Analyzer II | SAMEA862553  | ERR026651 | Castillo-Ramirez. 2012. GB. PMID:23270620 |
| 306 | <b>DEU14</b>  | 2008 | Turkey   | - | WGS Reads | Illumina Genome Analyzer II | SAMEA862555  | ERR026664 | Castillo-Ramirez. 2012. GB. PMID:23270620 |
| 307 | <b>DEU15</b>  | 2008 | Turkey   | - | WGS Reads | Illumina Genome Analyzer II | SAMEA862558  | ERR026665 | Castillo-Ramirez. 2012. GB. PMID:23270620 |
| 308 | <b>DEU16</b>  | 2008 | Turkey   | - | WGS Reads | Illumina Genome Analyzer II | SAMEA862557  | ERR026666 | Castillo-Ramirez. 2012. GB. PMID:23270620 |
| 309 | <b>DEU17</b>  | 2008 | Turkey   | - | WGS Reads | Illumina Genome Analyzer II | SAMEA862559  | ERR026667 | Castillo-Ramirez. 2012. GB. PMID:23270620 |
| 310 | <b>DEU19</b>  | 2008 | Turkey   | - | WGS Reads | Illumina Genome Analyzer II | SAMEA862561  | ERR026668 | Castillo-Ramirez. 2012. GB. PMID:23270620 |
| 311 | <b>DEU20</b>  | 2008 | Turkey   | - | WGS Reads | Illumina Genome Analyzer II | SAMEA862560  | ERR026669 | Castillo-Ramirez. 2012. GB. PMID:23270620 |
| 312 | <b>DEU23</b>  | 2008 | Turkey   | - | WGS Reads | Illumina Genome Analyzer II | SAMEA862541  | ERR026662 | Castillo-Ramirez. 2012. GB. PMID:23270620 |
| 313 | <b>DEU25</b>  | 2008 | Turkey   | - | WGS Reads | Illumina Genome Analyzer II | SAMEA862542  | ERR026663 | Castillo-Ramirez. 2012. GB. PMID:23270620 |
| 314 | <b>DEU27</b>  | 2007 | Turkey   | - | WGS Reads | Illumina Genome Analyzer II | SAMEA862536  | ERR026677 | Castillo-Ramirez. 2012. GB. PMID:23270620 |
| 315 | <b>DEU28</b>  | 2007 | Turkey   | - | WGS Reads | Illumina Genome Analyzer II | SAMEA862537  | ERR026678 | Castillo-Ramirez. 2012. GB. PMID:23270620 |
| 316 | <b>DEU29</b>  | 2007 | Turkey   | - | WGS Reads | Illumina Genome Analyzer II | SAMEA862538  | ERR026679 | Castillo-Ramirez. 2012. GB. PMID:23270620 |
| 317 | <b>DEU30</b>  | 2007 | Turkey   | - | WGS Reads | Illumina Genome Analyzer II | SAMEA862531  | ERR026680 | Castillo-Ramirez. 2012. GB. PMID:23270620 |
| 318 | <b>DEU35</b>  | 2007 | Turkey   | - | WGS Reads | Illumina Genome Analyzer II | SAMEA862662  | ERR026683 | Castillo-Ramirez. 2012. GB. PMID:23270620 |
| 319 | <b>DEU36</b>  | 2007 | Turkey   | - | WGS Reads | Illumina Genome Analyzer II | SAMEA862661  | ERR026684 | Castillo-Ramirez. 2012. GB. PMID:23270620 |
| 320 | <b>DEU37</b>  | 2007 | Turkey   | - | WGS Reads | Illumina Genome Analyzer II | SAMEA862660  | ERR026674 | Castillo-Ramirez. 2012. GB. PMID:23270620 |
| 321 | <b>DEU38</b>  | 2006 | Turkey   | - | WGS Reads | Illumina Genome Analyzer II | SAMEA862667  | ERR026675 | Castillo-Ramirez. 2012. GB. PMID:23270620 |
| 322 | <b>DEU39</b>  | 2006 | Turkey   | - | WGS Reads | Illumina Genome Analyzer II | SAMEA862666  | ERR026676 | Castillo-Ramirez. 2012. GB. PMID:23270620 |
| 323 | <b>DEU41</b>  | 2006 | Turkey   | - | WGS Reads | Illumina Genome Analyzer II | SAMEA862664  | ERR026690 | Castillo-Ramirez. 2012. GB. PMID:23270620 |
| 324 | <b>DEU42</b>  | 2006 | Turkey   | - | WGS Reads | Illumina Genome Analyzer II | SAMEA862655  | ERR026691 | Castillo-Ramirez. 2012. GB. PMID:23270620 |
| 325 | <b>DEU43</b>  | 2006 | Turkey   | - | WGS Reads | Illumina Genome Analyzer II | SAMEA862654  | ERR026692 | Castillo-Ramirez. 2012. GB. PMID:23270620 |
| 326 | <b>DEU46</b>  | 2006 | Turkey   | - | WGS Reads | Illumina Genome Analyzer II | SAMEA862570  | ERR026694 | Castillo-Ramirez. 2012. GB. PMID:23270620 |
| 327 | <b>DEU47</b>  | 2006 | Turkey   | - | WGS Reads | Illumina Genome Analyzer II | SAMEA862573  | ERR026695 | Castillo-Ramirez. 2012. GB. PMID:23270620 |
| 328 | <b>DEU49</b>  | 2006 | Turkey   | - | WGS Reads | Illumina Genome Analyzer II | SAMEA862567  | ERR026697 | Castillo-Ramirez. 2012. GB. PMID:23270620 |
| 329 | <b>DEU50</b>  | 2006 | Turkey   | - | WGS Reads | Illumina Genome Analyzer II | SAMEA862566  | ERR026687 | Castillo-Ramirez. 2012. GB. PMID:23270620 |
| 330 | <b>ES26</b>   | 1996 | Spain    | - | WGS Reads | Illumina Genome Analyzer II | SAMEA862530  | ERR024981 | Castillo-Ramirez. 2012. GB. PMID:23270620 |
| 331 | <b>FFP103</b> | 1990 | Portugal | - | WGS Reads | Illumina HiSeq 2000         | SAMEA1029533 | ERR064932 | Castillo-Ramirez. 2012. GB. PMID:23270620 |
| 332 | <b>GRE4</b>   | 1998 | Greece   | - | WGS Reads | Illumina HiSeq 2000         | SAMEA1029513 | ERR064904 | Castillo-Ramirez. 2012. GB. PMID:23270620 |
| 333 | <b>GRE18</b>  | 1998 | Greece   | - | WGS Reads | Illumina HiSeq 2000         | SAMEA1029546 | ERR064902 | Castillo-Ramirez. 2012. GB. PMID:23270620 |
| 334 | <b>GRE108</b> | 1998 | Greece   | - | WGS Reads | Illumina HiSeq 2000         | SAMEA1029521 | ERR064936 | Castillo-Ramirez. 2012. GB. PMID:23270620 |
| 335 | <b>GRE317</b> | 1999 | Greece   | - | WGS Reads | Illumina HiSeq 2000         | SAMEA1029564 | ERR064903 | Castillo-Ramirez. 2012. GB. PMID:23270620 |
| 336 | <b>H202</b>   | 2006 | Thailand | - | WGS Reads | Illumina Genome Analyzer II | SAMEA862584  | ERR025802 | Castillo-Ramirez. 2012. GB. PMID:23270620 |
| 337 | <b>H211</b>   | 2006 | Denmark  | - | WGS Reads | Illumina Genome Analyzer II | SAMEA862528  | ERR024972 | Castillo-Ramirez. 2012. GB. PMID:23270620 |
| 338 | <b>H216</b>   | 2006 | Denmark  | - | WGS Reads | Illumina Genome Analyzer II | SAMEA862587  | ERR025803 | Castillo-Ramirez. 2012. GB. PMID:23270620 |
| 339 | <b>H24</b>    | 2005 | Egypt    | - | WGS Reads | Illumina Genome Analyzer II | SAMEA862527  | ERR024973 | Castillo-Ramirez. 2012. GB. PMID:23270620 |



|     |                |      |               |   |           |                             |              |           |                                           |
|-----|----------------|------|---------------|---|-----------|-----------------------------|--------------|-----------|-------------------------------------------|
| 340 | <b>H482</b>    | 2007 | Romania       | - | WGS Reads | Illumina Genome Analyzer II | SAMEA862595  | ERR024983 | Castillo-Ramirez. 2012. GB. PMID:23270620 |
| 341 | <b>HDG2</b>    | 1992 | Portugal      | - | WGS Reads | Illumina HiSeq 2000         | SAMEA1029561 | ERR064930 | Castillo-Ramirez. 2012. GB. PMID:23270620 |
| 342 | <b>HGSA9</b>   | 1997 | Portugal      | - | WGS Reads | Illumina HiSeq 2000         | SAMEA1029534 | ERR064921 | Castillo-Ramirez. 2012. GB. PMID:23270620 |
| 343 | <b>HGSA142</b> | 2003 | Portugal      | - | WGS Reads | Illumina HiSeq 2000         | SAMEA1029517 | ERR064922 | Castillo-Ramirez. 2012. GB. PMID:23270620 |
| 344 | <b>HSA10</b>   | 1992 | Portugal      | - | WGS Reads | Illumina HiSeq 2000         | SAMEA1029520 | ERR064931 | Castillo-Ramirez. 2012. GB. PMID:23270620 |
| 345 | <b>HSA11</b>   | 1992 | Portugal      | - | WGS Reads | Illumina HiSeq 2000         | SAMEA1029542 | ERR064929 | Castillo-Ramirez. 2012. GB. PMID:23270620 |
| 346 | <b>HSJ216</b>  | 1997 | Portugal      | - | WGS Reads | Illumina HiSeq 2000         | SAMEA1029550 | ERR064920 | Castillo-Ramirez. 2012. GB. PMID:23270620 |
| 347 | <b>HU106</b>   | 1996 | Hungary       | - | WGS Reads | Illumina HiSeq 2000         | SAMEA1029518 | ERR064927 | Castillo-Ramirez. 2012. GB. PMID:23270620 |
| 348 | <b>HU109</b>   | 1996 | Hungary       | - | WGS Reads | Illumina HiSeq 2000         | SAMEA1029567 | ERR064909 | Castillo-Ramirez. 2012. GB. PMID:23270620 |
| 349 | <b>HU4</b>     | 2006 | Turkey        | - | WGS Reads | Illumina Genome Analyzer II | SAMEA862618  | ERR026705 | Castillo-Ramirez. 2012. GB. PMID:23270620 |
| 350 | <b>HU5</b>     | 2006 | Turkey        | - | WGS Reads | Illumina Genome Analyzer II | SAMEA862625  | ERR026706 | Castillo-Ramirez. 2012. GB. PMID:23270620 |
| 351 | <b>HU6</b>     | 2006 | Turkey        | - | WGS Reads | Illumina Genome Analyzer II | SAMEA862624  | ERR026707 | Castillo-Ramirez. 2012. GB. PMID:23270620 |
| 352 | <b>HU7</b>     | 2006 | Turkey        | - | WGS Reads | Illumina Genome Analyzer II | SAMEA862623  | ERR026708 | Castillo-Ramirez. 2012. GB. PMID:23270620 |
| 353 | <b>HU8</b>     | 2006 | Turkey        | - | WGS Reads | Illumina Genome Analyzer II | SAMEA862622  | ERR026709 | Castillo-Ramirez. 2012. GB. PMID:23270620 |
| 354 | <b>HU9</b>     | 2007 | Turkey        | - | WGS Reads | Illumina Genome Analyzer II | SAMEA862627  | ERR026710 | Castillo-Ramirez. 2012. GB. PMID:23270620 |
| 355 | <b>HU11</b>    | 2007 | Turkey        | - | WGS Reads | Illumina Genome Analyzer II | SAMEA862634  | ERR026701 | Castillo-Ramirez. 2012. GB. PMID:23270620 |
| 356 | <b>HU13</b>    | 2007 | Turkey        | - | WGS Reads | Illumina Genome Analyzer II | SAMEA862636  | ERR024668 | Castillo-Ramirez. 2012. GB. PMID:23270620 |
| 357 | <b>HU14</b>    | 2007 | Turkey        | - | WGS Reads | Illumina Genome Analyzer II | SAMEA862637  | ERR024672 | Castillo-Ramirez. 2012. GB. PMID:23270620 |
| 358 | <b>HU15</b>    | 2007 | Turkey        | - | WGS Reads | Illumina Genome Analyzer II | SAMEA862630  | ERR024673 | Castillo-Ramirez. 2012. GB. PMID:23270620 |
| 359 | <b>HU16</b>    | 2007 | Turkey        | - | WGS Reads | Illumina Genome Analyzer II | SAMEA862631  | ERR024674 | Castillo-Ramirez. 2012. GB. PMID:23270620 |
| 360 | <b>HU17</b>    | 2007 | Turkey        | - | WGS Reads | Illumina Genome Analyzer II | SAMEA862632  | ERR024675 | Castillo-Ramirez. 2012. GB. PMID:23270620 |
| 361 | <b>HU21</b>    | 2008 | Turkey        | - | WGS Reads | Illumina Genome Analyzer II | SAMEA862639  | ERR024678 | Castillo-Ramirez. 2012. GB. PMID:23270620 |
| 362 | <b>HU23</b>    | 2009 | Turkey        | - | WGS Reads | Illumina Genome Analyzer II | SAMEA862643  | ERR024679 | Castillo-Ramirez. 2012. GB. PMID:23270620 |
| 363 | <b>HU25</b>    | 1993 | Brazil        | - | WGS Reads | Illumina HiSeq 2000         | SAMEA1029569 | ERR024670 | Castillo-Ramirez. 2012. GB. PMID:23270620 |
| 364 | <b>HU26</b>    | 2009 | Turkey        | - | WGS Reads | Illumina Genome Analyzer II | SAMEA862644  | ERR024671 | Castillo-Ramirez. 2012. GB. PMID:23270620 |
| 365 | <b>HUR18</b>   | 1997 | Hungary       | - | WGS Reads | Illumina HiSeq 2000         | SAMEA1029551 | ERR064910 | Castillo-Ramirez. 2012. GB. PMID:23270620 |
| 366 | <b>HUSA304</b> | 1993 | Hungary       | - | WGS Reads | Illumina HiSeq 2000         | SAMEA1029531 | ERR064928 | Castillo-Ramirez. 2012. GB. PMID:23270620 |
| 367 | <b>ICP5011</b> | 1993 | Portugal      | - | WGS Reads | Illumina HiSeq 2000         | SAMEA1029545 | ERR064933 | Castillo-Ramirez. 2012. GB. PMID:23270620 |
| 368 | <b>ICP5014</b> | 1993 | Portugal      | - | WGS Reads | Illumina HiSeq 2000         | SAMEA1029543 | ERR064934 | Castillo-Ramirez. 2012. GB. PMID:23270620 |
| 369 | <b>ICP5062</b> | 1993 | Portugal      | - | WGS Reads | Illumina HiSeq 2000         | SAMEA1029562 | ERR064935 | Castillo-Ramirez. 2012. GB. PMID:23270620 |
| 370 | <b>IU1</b>     | 2006 | Turkey        | - | WGS Reads | Illumina Genome Analyzer II | SAMEA862647  | ERR024681 | Castillo-Ramirez. 2012. GB. PMID:23270620 |
| 371 | <b>IU2</b>     | 2006 | Turkey        | - | WGS Reads | Illumina Genome Analyzer II | SAMEA862646  | ERR024685 | Castillo-Ramirez. 2012. GB. PMID:23270620 |
| 372 | <b>IU4</b>     | 2006 | Turkey        | - | WGS Reads | Illumina Genome Analyzer II | SAMEA862648  | ERR024687 | Castillo-Ramirez. 2012. GB. PMID:23270620 |
| 373 | <b>IU6</b>     | 2006 | Turkey        | - | WGS Reads | Illumina Genome Analyzer II | SAMEA862651  | ERR024688 | Castillo-Ramirez. 2012. GB. PMID:23270620 |
| 374 | <b>IU7</b>     | 2007 | Turkey        | - | WGS Reads | Illumina Genome Analyzer II | SAMEA862650  | ERR024689 | Castillo-Ramirez. 2012. GB. PMID:23270620 |
| 375 | <b>IU9</b>     | 2007 | Turkey        | - | WGS Reads | Illumina Genome Analyzer II | SAMEA862617  | ERR024691 | Castillo-Ramirez. 2012. GB. PMID:23270620 |
| 376 | <b>IU10</b>    | 2007 | Turkey        | - | WGS Reads | Illumina Genome Analyzer II | SAMEA862652  | ERR024692 | Castillo-Ramirez. 2012. GB. PMID:23270620 |
| 377 | <b>IU11</b>    | 2007 | Turkey        | - | WGS Reads | Illumina Genome Analyzer II | SAMEA862653  | ERR024682 | Castillo-Ramirez. 2012. GB. PMID:23270620 |
| 378 | <b>IU12</b>    | 2007 | Turkey        | - | WGS Reads | Illumina Genome Analyzer II | SAMEA862658  | ERR024683 | Castillo-Ramirez. 2012. GB. PMID:23270620 |
| 379 | <b>IU13</b>    | 2007 | Turkey        | - | WGS Reads | Illumina Genome Analyzer II | SAMEA862659  | ERR024684 | Castillo-Ramirez. 2012. GB. PMID:23270620 |
| 380 | <b>IU15</b>    | 2007 | Turkey        | - | WGS Reads | Illumina Genome Analyzer II | SAMEA862657  | ERR024974 | Castillo-Ramirez. 2012. GB. PMID:23270620 |
| 381 | <b>LHH1</b>    | 1994 | United States | - | WGS Reads | Illumina HiSeq 2000         | SAMEA1029523 | ERR064900 | Castillo-Ramirez. 2012. GB. PMID:23270620 |
| 382 | <b>LIT68</b>   | 1996 | Lithuania     | - | WGS Reads | Illumina Genome Analyzer II | SAMEA862586  | ERR025804 | Castillo-Ramirez. 2012. GB. PMID:23270620 |
| 383 | <b>LIT76</b>   | 1996 | Lithuania     | - | WGS Reads | Illumina Genome Analyzer II | SAMEA862593  | ERR025805 | Castillo-Ramirez. 2012. GB. PMID:23270620 |
| 384 | <b>LIT89</b>   | 1996 | Lithuania     | - | WGS Reads | Illumina Genome Analyzer II | SAMEA862592  | ERR025796 | Castillo-Ramirez. 2012. GB. PMID:23270620 |
| 385 | <b>M116</b>    | 2004 | Vietnam       | - | WGS Reads | Illumina Genome Analyzer II | SAMEA862545  | ERR024988 | Castillo-Ramirez. 2012. GB. PMID:23270620 |
| 386 | <b>M278</b>    | 2005 | Portugal      | - | WGS Reads | Illumina Genome Analyzer II | SAMEA862548  | ERR024991 | Castillo-Ramirez. 2012. GB. PMID:23270620 |
| 387 | <b>M418</b>    | 2006 | India         | - | WGS Reads | Illumina Genome Analyzer II | SAMEA862549  | ERR024992 | Castillo-Ramirez. 2012. GB. PMID:23270620 |
| 388 | <b>M592</b>    | 2006 | Syria         | - | WGS Reads | Illumina Genome Analyzer II | SAMEA862550  | ERR024993 | Castillo-Ramirez. 2012. GB. PMID:23270620 |
| 389 | <b>M705</b>    | 2007 | Thailand      | - | WGS Reads | Illumina Genome Analyzer II | SAMEA862613  | ERR024958 | Castillo-Ramirez. 2012. GB. PMID:23270620 |
| 390 | <b>M996</b>    | 2008 | China         | - | WGS Reads | Illumina Genome Analyzer II | SAMEA862551  | ERR024994 | Castillo-Ramirez. 2012. GB. PMID:23270620 |

|     |               |      |                |   |           |                             |              |            |                                           |
|-----|---------------|------|----------------|---|-----------|-----------------------------|--------------|------------|-------------------------------------------|
| 391 | <b>M1229</b>  | 2009 | Denmark        | - | WGS Reads | Illumina Genome Analyzer II | SAMEA862546  | ERR024989  | Castillo-Ramirez. 2012. GB. PMID:23270620 |
| 392 | <b>MAL1</b>   | 1996 | Malaysia       | - | WGS Reads | Illumina Genome Analyzer II | SAMEA862552  | ERR024984  | Castillo-Ramirez. 2012. GB. PMID:23270620 |
| 393 | <b>MAL3</b>   | 1996 | Malaysia       | - | WGS Reads | Illumina Genome Analyzer II | SAMEA862609  | ERR024964  | Castillo-Ramirez. 2012. GB. PMID:23270620 |
| 394 | <b>MAL9</b>   | 1996 | Malaysia       | - | WGS Reads | Illumina Genome Analyzer II | SAMEA862607  | ERR024966  | Castillo-Ramirez. 2012. GB. PMID:23270620 |
| 395 | <b>MAL11</b>  | 1996 | Malaysia       | - | WGS Reads | Illumina Genome Analyzer II | SAMEA862543  | ERR024985  | Castillo-Ramirez. 2012. GB. PMID:23270620 |
| 396 | <b>MAL119</b> | 1996 | Malaysia       | - | WGS Reads | Illumina Genome Analyzer II | SAMEA862611  | ERR024962  | Castillo-Ramirez. 2012. GB. PMID:23270620 |
| 397 | <b>MAL215</b> | 1996 | Malaysia       | - | WGS Reads | Illumina Genome Analyzer II | SAMEA862608  | ERR024963  | Castillo-Ramirez. 2012. GB. PMID:23270620 |
| 398 | <b>MU1</b>    | 2008 | Turkey         | - | WGS Reads | Illumina Genome Analyzer II | SAMEA862569  | ERR026688  | Castillo-Ramirez. 2012. GB. PMID:23270620 |
| 399 | <b>MU3</b>    | 2008 | Turkey         | - | WGS Reads | Illumina Genome Analyzer II | SAMEA862565  | ERR026003  | Castillo-Ramirez. 2012. GB. PMID:23270620 |
| 400 | <b>MU4</b>    | 2008 | Turkey         | - | WGS Reads | Illumina Genome Analyzer II | SAMEA862564  | ERR026007  | Castillo-Ramirez. 2012. GB. PMID:23270620 |
| 401 | <b>MU5</b>    | 2008 | Turkey         | - | WGS Reads | Illumina Genome Analyzer II | SAMEA862604  | ERR026008  | Castillo-Ramirez. 2012. GB. PMID:23270620 |
| 402 | <b>MU6</b>    | 2008 | Turkey         | - | WGS Reads | Illumina Genome Analyzer II | SAMEA862605  | ERR026009  | Castillo-Ramirez. 2012. GB. PMID:23270620 |
| 403 | <b>MU7</b>    | 2007 | Turkey         | - | WGS Reads | Illumina Genome Analyzer II | SAMEA862602  | ERR026010  | Castillo-Ramirez. 2012. GB. PMID:23270620 |
| 404 | <b>MU9</b>    | 2007 | Turkey         | - | WGS Reads | Illumina Genome Analyzer II | SAMEA862603  | ERR026011  | Castillo-Ramirez. 2012. GB. PMID:23270620 |
| 405 | <b>MU10</b>   | 2006 | Turkey         | - | WGS Reads | Illumina Genome Analyzer II | SAMEA862600  | ERR026012  | Castillo-Ramirez. 2012. GB. PMID:23270620 |
| 406 | <b>MU20</b>   | 2009 | Turkey         | - | WGS Reads | Illumina Genome Analyzer II | SAMEA862620  | ERR026703  | Castillo-Ramirez. 2012. GB. PMID:23270620 |
| 407 | <b>NA21</b>   | 2006 | Sri Lanka      | - | WGS Reads | Illumina Genome Analyzer II | SAMEA862544  | ERR024986  | Castillo-Ramirez. 2012. GB. PMID:23270620 |
| 408 | <b>NA32</b>   | 2006 | Denmark        | - | WGS Reads | Illumina Genome Analyzer II | SAMEA862615  | ERR024967  | Castillo-Ramirez. 2012. GB. PMID:23270620 |
| 409 | <b>P32</b>    | 1996 | Poland         | - | WGS Reads | Illumina Genome Analyzer II | SAMEA862589  | ERR025795  | Castillo-Ramirez. 2012. GB. PMID:23270620 |
| 410 | <b>R35</b>    | 1987 | United States  | - | WGS Reads | Illumina HiSeq 2000         | SAMEA1029532 | ERR064901  | Castillo-Ramirez. 2012. GB. PMID:23270620 |
| 411 | <b>RA3</b>    | 1996 | Argentina      | - | WGS Reads | Illumina Genome Analyzer II | SAMEA862588  | ERR025798  | Castillo-Ramirez. 2012. GB. PMID:23270620 |
| 412 | <b>RA6</b>    | 1996 | Argentina      | - | WGS Reads | Illumina Genome Analyzer II | SAMEA862591  | ERR025799  | Castillo-Ramirez. 2012. GB. PMID:23270620 |
| 413 | <b>RA7</b>    | 1996 | Argentina      | - | WGS Reads | Illumina Genome Analyzer II | SAMEA862616  | ERR024968  | Castillo-Ramirez. 2012. GB. PMID:23270620 |
| 414 | <b>S2</b>     | 2006 | Thailand       | - | WGS Reads | Illumina HiSeq 2000         | SAMEA1029563 | ERR064953  | Castillo-Ramirez. 2012. GB. PMID:23270620 |
| 415 | <b>S7</b>     | 2006 | Thailand       | - | WGS Reads | Illumina HiSeq 2000         | SAMEA1029556 | ERR064946  | Castillo-Ramirez. 2012. GB. PMID:23270620 |
| 416 | <b>S21</b>    | 2006 | Thailand       | - | WGS Reads | Illumina HiSeq 2000         | SAMEA1029536 | ERR064958  | Castillo-Ramirez. 2012. GB. PMID:23270620 |
| 417 | <b>S24</b>    | 2006 | Thailand       | - | WGS Reads | Illumina HiSeq 2000         | SAMEA1029553 | ERR064957  | Castillo-Ramirez. 2012. GB. PMID:23270620 |
| 418 | <b>S25</b>    | 2006 | Thailand       | - | WGS Reads | Illumina HiSeq 2000         | SAMEA1029535 | ERR064951  | Castillo-Ramirez. 2012. GB. PMID:23270620 |
| 419 | <b>S26</b>    | 2006 | Thailand       | - | WGS Reads | Illumina HiSeq 2000         | SAMEA1029511 | ERR064949  | Castillo-Ramirez. 2012. GB. PMID:23270620 |
| 420 | <b>S38</b>    | 2006 | Thailand       | - | WGS Reads | Illumina HiSeq 2000         | SAMEA1029568 | ERR064947  | Castillo-Ramirez. 2012. GB. PMID:23270620 |
| 421 | <b>S39</b>    | 2006 | Thailand       | - | WGS Reads | Illumina HiSeq 2000         | SAMEA1029558 | ERR064959  | Castillo-Ramirez. 2012. GB. PMID:23270620 |
| 422 | <b>S40</b>    | 2006 | Thailand       | - | WGS Reads | Illumina HiSeq 2000         | SAMEA1029528 | ERR064944  | Castillo-Ramirez. 2012. GB. PMID:23270620 |
| 423 | <b>S42</b>    | 2006 | Thailand       | - | WGS Reads | Illumina HiSeq 2000         | SAMEA1029515 | ERR064955  | Castillo-Ramirez. 2012. GB. PMID:23270620 |
| 424 | <b>S71</b>    | 2007 | Thailand       | - | WGS Reads | Illumina HiSeq 2000         | SAMEA1029541 | ERR064943  | Castillo-Ramirez. 2012. GB. PMID:23270620 |
| 425 | <b>S78</b>    | 2007 | Thailand       | - | WGS Reads | Illumina HiSeq 2000         | SAMEA1029525 | ERR064954  | Castillo-Ramirez. 2012. GB. PMID:23270620 |
| 426 | <b>S81</b>    | 2007 | Thailand       | - | WGS Reads | Illumina HiSeq 2000         | SAMEA1029565 | ERR064956  | Castillo-Ramirez. 2012. GB. PMID:23270620 |
| 427 | <b>S85</b>    | 2007 | Thailand       | - | WGS Reads | Illumina HiSeq 2000         | SAMEA1029529 | ERR064939  | Castillo-Ramirez. 2012. GB. PMID:23270620 |
| 428 | <b>S87</b>    | 2007 | Thailand       | - | WGS Reads | Illumina HiSeq 2000         | SAMEA1029512 | ERR064941  | Castillo-Ramirez. 2012. GB. PMID:23270620 |
| 429 | <b>S93</b>    | 2007 | Thailand       | - | WGS Reads | Illumina HiSeq 2000         | SAMEA1029560 | ERR064942  | Castillo-Ramirez. 2012. GB. PMID:23270620 |
| 430 | <b>S97</b>    | 2007 | Thailand       | - | WGS Reads | Illumina HiSeq 2000         | SAMEA1029522 | ERR064950  | Castillo-Ramirez. 2012. GB. PMID:23270620 |
| 431 | <b>S102</b>   | 2007 | Thailand       | - | WGS Reads | Illumina HiSeq 2000         | SAMEA1029519 | ERR064945  | Castillo-Ramirez. 2012. GB. PMID:23270620 |
| 432 | <b>S106</b>   | 2007 | Thailand       | - | WGS Reads | Illumina HiSeq 2000         | SAMEA1029547 | ERR064952  | Castillo-Ramirez. 2012. GB. PMID:23270620 |
| 433 | <b>S130</b>   | 2007 | Thailand       | - | WGS Reads | Illumina HiSeq 2000         | SAMEA1029516 | ERR064940  | Castillo-Ramirez. 2012. GB. PMID:23270620 |
| 434 | <b>TUR1</b>   | 1996 | Turkey         | - | WGS Reads | Illumina HiSeq 2000         | SAMEA1029552 | ERR064906  | Castillo-Ramirez. 2012. GB. PMID:23270620 |
| 435 | <b>TUR9</b>   | 1995 | Turkey         | - | WGS Reads | Illumina HiSeq 2000         | SAMEA1029530 | ERR064905  | Castillo-Ramirez. 2012. GB. PMID:23270620 |
| 436 | <b>TUR27</b>  | 1996 | Turkey         | - | WGS Reads | Illumina HiSeq 2000         | SAMEA1029557 | ERR064908  | Castillo-Ramirez. 2012. GB. PMID:23270620 |
| 437 | <b>UK102</b>  | 1996 | United Kingdom | - | WGS Reads | Illumina Genome Analyzer II | SAMEA862590  | ERR025800  | Castillo-Ramirez. 2012. GB. PMID:23270620 |
| 438 | <b>URU34</b>  | 1997 | Uruguay        | - | WGS Reads | Illumina HiSeq 2000         | SAMEA1029544 | ERR064925  | Castillo-Ramirez. 2012. GB. PMID:23270620 |
| 439 | <b>URU110</b> | 1998 | Uruguay        | - | WGS Reads | Illumina HiSeq 2000         | SAMEA1029540 | ERR064911  | Castillo-Ramirez. 2012. GB. PMID:23270620 |
| 440 | <b>SR2852</b> | 2005 | United States  | - | WGS Reads | Illumina HiSeq 2000         | SAMN02649763 | SRR1177896 | Alam. GenomeBiolEvol. 2014. PMID:24787619 |
| 441 | <b>031_01</b> | 2001 | Singapore      | - | WGS Reads | Illumina Genome Analyzer II | SAMEA800273  | ERR029457  | Hsu. 2015. GenBiol. PMID:25903077         |

|     |                 |      |           |   |           |                             |             |           |                                   |
|-----|-----------------|------|-----------|---|-----------|-----------------------------|-------------|-----------|-----------------------------------|
| 442 | <b>362_05</b>   | 2005 | Singapore | - | WGS Reads | Illumina Genome Analyzer II | SAMEA800274 | ERR029458 | Hsu. 2015. GenBiol. PMID:25903077 |
| 443 | <b>058_08</b>   | 2008 | Singapore | - | WGS Reads | Illumina Genome Analyzer II | SAMEA800253 | ERR029464 | Hsu. 2015. GenBiol. PMID:25903077 |
| 444 | <b>352_05</b>   | 2005 | Singapore | - | WGS Reads | Illumina Genome Analyzer II | SAMEA800280 | ERR029467 | Hsu. 2015. GenBiol. PMID:25903077 |
| 445 | <b>131_09</b>   | 2009 | Singapore | - | WGS Reads | Illumina Genome Analyzer II | SAMEA800276 | ERR029469 | Hsu. 2015. GenBiol. PMID:25903077 |
| 446 | <b>009_10</b>   | 2010 | Singapore | - | WGS Reads | Illumina Genome Analyzer II | SAMEA800287 | ERR029470 | Hsu. 2015. GenBiol. PMID:25903077 |
| 447 | <b>134_09</b>   | 2009 | Singapore | - | WGS Reads | Illumina Genome Analyzer II | SAMEA800277 | ERR029472 | Hsu. 2015. GenBiol. PMID:25903077 |
| 448 | <b>135_09</b>   | 2009 | Singapore | - | WGS Reads | Illumina Genome Analyzer II | SAMEA800278 | ERR029473 | Hsu. 2015. GenBiol. PMID:25903077 |
| 449 | <b>049_05</b>   | 2005 | Singapore | - | WGS Reads | Illumina Genome Analyzer II | SAMEA800292 | ERR029476 | Hsu. 2015. GenBiol. PMID:25903077 |
| 450 | <b>CGH1_08</b>  | 2008 | Singapore | - | WGS Reads | Illumina Genome Analyzer II | SAMEA800297 | ERR030155 | Hsu. 2015. GenBiol. PMID:25903077 |
| 451 | <b>CGH1_10</b>  | 2010 | Singapore | - | WGS Reads | Illumina Genome Analyzer II | SAMEA800177 | ERR030157 | Hsu. 2015. GenBiol. PMID:25903077 |
| 452 | <b>CGH2_08</b>  | 2008 | Singapore | - | WGS Reads | Illumina Genome Analyzer II | SAMEA800181 | ERR030159 | Hsu. 2015. GenBiol. PMID:25903077 |
| 453 | <b>CGH3_10</b>  | 2010 | Singapore | - | WGS Reads | Illumina Genome Analyzer II | SAMEA800213 | ERR030170 | Hsu. 2015. GenBiol. PMID:25903077 |
| 454 | <b>CGH6_06</b>  | 2006 | Singapore | - | WGS Reads | Illumina Genome Analyzer II | SAMEA800382 | ERR030173 | Hsu. 2015. GenBiol. PMID:25903077 |
| 455 | <b>CGH4_09</b>  | 2009 | Singapore | - | WGS Reads | Illumina Genome Analyzer II | SAMEA800215 | ERR030176 | Hsu. 2015. GenBiol. PMID:25903077 |
| 456 | <b>CGH4_10</b>  | 2010 | Singapore | - | WGS Reads | Illumina Genome Analyzer II | SAMEA800216 | ERR030177 | Hsu. 2015. GenBiol. PMID:25903077 |
| 457 | <b>CGH5_09</b>  | 2009 | Singapore | - | WGS Reads | Illumina Genome Analyzer II | SAMEA800383 | ERR030182 | Hsu. 2015. GenBiol. PMID:25903077 |
| 458 | <b>012_00</b>   | 2000 | Singapore | - | WGS Reads | Illumina Genome Analyzer II | SAMEA800207 | ERR030186 | Hsu. 2015. GenBiol. PMID:25903077 |
| 459 | <b>011_00</b>   | 2000 | Singapore | - | WGS Reads | Illumina Genome Analyzer II | SAMEA800205 | ERR030191 | Hsu. 2015. GenBiol. PMID:25903077 |
| 460 | <b>003_06</b>   | 2006 | Singapore | - | WGS Reads | Illumina Genome Analyzer II | SAMEA800206 | ERR030192 | Hsu. 2015. GenBiol. PMID:25903077 |
| 461 | <b>106_06</b>   | 2006 | Singapore | - | WGS Reads | Illumina Genome Analyzer II | SAMEA800200 | ERR030194 | Hsu. 2015. GenBiol. PMID:25903077 |
| 462 | <b>100_06</b>   | 2006 | Singapore | - | WGS Reads | Illumina Genome Analyzer II | SAMEA800201 | ERR030195 | Hsu. 2015. GenBiol. PMID:25903077 |
| 463 | <b>106_07</b>   | 2007 | Singapore | - | WGS Reads | Illumina Genome Analyzer II | SAMEA800360 | ERR030200 | Hsu. 2015. GenBiol. PMID:25903077 |
| 464 | <b>339_07</b>   | 2007 | Singapore | - | WGS Reads | Illumina Genome Analyzer II | SAMEA800357 | ERR030201 | Hsu. 2015. GenBiol. PMID:25903077 |
| 465 | <b>157_04</b>   | 2004 | Singapore | - | WGS Reads | Illumina Genome Analyzer II | SAMEA800333 | ERR030202 | Hsu. 2015. GenBiol. PMID:25903077 |
| 466 | <b>019_01</b>   | 2001 | Singapore | - | WGS Reads | Illumina Genome Analyzer II | SAMEA800332 | ERR030203 | Hsu. 2015. GenBiol. PMID:25903077 |
| 467 | <b>002_00</b>   | 2000 | Singapore | - | WGS Reads | Illumina Genome Analyzer II | SAMEA800331 | ERR030204 | Hsu. 2015. GenBiol. PMID:25903077 |
| 468 | <b>020_01</b>   | 2001 | Singapore | - | WGS Reads | Illumina Genome Analyzer II | SAMEA800329 | ERR030205 | Hsu. 2015. GenBiol. PMID:25903077 |
| 469 | <b>101_07</b>   | 2007 | Singapore | - | WGS Reads | Illumina Genome Analyzer II | SAMEA800327 | ERR030209 | Hsu. 2015. GenBiol. PMID:25903077 |
| 470 | <b>030_05</b>   | 2005 | Singapore | - | WGS Reads | Illumina Genome Analyzer II | SAMEA800258 | ERR030213 | Hsu. 2015. GenBiol. PMID:25903077 |
| 471 | <b>255_04</b>   | 2004 | Singapore | - | WGS Reads | Illumina Genome Analyzer II | SAMEA800353 | ERR030216 | Hsu. 2015. GenBiol. PMID:25903077 |
| 472 | <b>259_04</b>   | 2004 | Singapore | - | WGS Reads | Illumina Genome Analyzer II | SAMEA800354 | ERR030217 | Hsu. 2015. GenBiol. PMID:25903077 |
| 473 | <b>263_04</b>   | 2004 | Singapore | - | WGS Reads | Illumina Genome Analyzer II | SAMEA800352 | ERR030219 | Hsu. 2015. GenBiol. PMID:25903077 |
| 474 | <b>264_04</b>   | 2004 | Singapore | - | WGS Reads | Illumina Genome Analyzer II | SAMEA800261 | ERR030220 | Hsu. 2015. GenBiol. PMID:25903077 |
| 475 | <b>028_01</b>   | 2001 | Singapore | - | WGS Reads | Illumina Genome Analyzer II | SAMEA800260 | ERR030221 | Hsu. 2015. GenBiol. PMID:25903077 |
| 476 | <b>069_02</b>   | 2002 | Singapore | - | WGS Reads | Illumina Genome Analyzer II | SAMEA800271 | ERR030224 | Hsu. 2015. GenBiol. PMID:25903077 |
| 477 | <b>006_00</b>   | 2000 | Singapore | - | WGS Reads | Illumina Genome Analyzer II | SAMEA800285 | ERR030228 | Hsu. 2015. GenBiol. PMID:25903077 |
| 478 | <b>067_02</b>   | 2002 | Singapore | - | WGS Reads | Illumina Genome Analyzer II | SAMEA800265 | ERR030232 | Hsu. 2015. GenBiol. PMID:25903077 |
| 479 | <b>068_02</b>   | 2002 | Singapore | - | WGS Reads | Illumina Genome Analyzer II | SAMEA800272 | ERR030233 | Hsu. 2015. GenBiol. PMID:25903077 |
| 480 | <b>071_03</b>   | 2003 | Singapore | - | WGS Reads | Illumina Genome Analyzer II | SAMEA800269 | ERR030235 | Hsu. 2015. GenBiol. PMID:25903077 |
| 481 | <b>078_05</b>   | 2005 | Singapore | - | WGS Reads | Illumina Genome Analyzer II | SAMEA800264 | ERR030238 | Hsu. 2015. GenBiol. PMID:25903077 |
| 482 | <b>086_03</b>   | 2003 | Singapore | - | WGS Reads | Illumina Genome Analyzer II | SAMEA800263 | ERR030239 | Hsu. 2015. GenBiol. PMID:25903077 |
| 483 | <b>009_00</b>   | 2000 | Singapore | - | WGS Reads | Illumina Genome Analyzer II | SAMEA800336 | ERR030240 | Hsu. 2015. GenBiol. PMID:25903077 |
| 484 | <b>TTSH1_01</b> | 2001 | Singapore | - | WGS Reads | Illumina Genome Analyzer II | SAMEA800251 | ERR030242 | Hsu. 2015. GenBiol. PMID:25903077 |
| 485 | <b>TTSH2_07</b> | 2007 | Singapore | - | WGS Reads | Illumina Genome Analyzer II | SAMEA800229 | ERR030249 | Hsu. 2015. GenBiol. PMID:25903077 |
| 486 | <b>TTSH1_10</b> | 2010 | Singapore | - | WGS Reads | Illumina Genome Analyzer II | SAMEA800219 | ERR030252 | Hsu. 2015. GenBiol. PMID:25903077 |
| 487 | <b>TTSH2_03</b> | 2003 | Singapore | - | WGS Reads | Illumina Genome Analyzer II | SAMEA800226 | ERR030255 | Hsu. 2015. GenBiol. PMID:25903077 |
| 488 | <b>TTSH2_08</b> | 2008 | Singapore | - | WGS Reads | Illumina Genome Analyzer II | SAMEA800230 | ERR030259 | Hsu. 2015. GenBiol. PMID:25903077 |
| 489 | <b>TTSH3_07</b> | 2007 | Singapore | - | WGS Reads | Illumina Genome Analyzer II | SAMEA800196 | ERR030260 | Hsu. 2015. GenBiol. PMID:25903077 |
| 490 | <b>TTSH3_08</b> | 2008 | Singapore | - | WGS Reads | Illumina Genome Analyzer II | SAMEA800232 | ERR030261 | Hsu. 2015. GenBiol. PMID:25903077 |
| 491 | <b>TTSH3_03</b> | 2003 | Singapore | - | WGS Reads | Illumina Genome Analyzer II | SAMEA800234 | ERR030266 | Hsu. 2015. GenBiol. PMID:25903077 |
| 492 | <b>TTSH4_02</b> | 2002 | Singapore | - | WGS Reads | Illumina Genome Analyzer II | SAMEA800293 | ERR030276 | Hsu. 2015. GenBiol. PMID:25903077 |

|     |                    |      |           |   |           |                             |              |            |                                            |
|-----|--------------------|------|-----------|---|-----------|-----------------------------|--------------|------------|--------------------------------------------|
| 493 | <b>TTSH4_03</b>    | 2003 | Singapore | - | WGS Reads | Illumina Genome Analyzer II | SAMEA800372  | ERR030277  | Hsu. 2015. GenBiol. PMID:25903077          |
| 494 | <b>TTSH5_02</b>    | 2002 | Singapore | - | WGS Reads | Illumina Genome Analyzer II | SAMEA800345  | ERR031666  | Hsu. 2015. GenBiol. PMID:25903077          |
| 495 | <b>TTSH5_06</b>    | 2006 | Singapore | - | WGS Reads | Illumina Genome Analyzer II | SAMEA800346  | ERR031670  | Hsu. 2015. GenBiol. PMID:25903077          |
| 496 | <b>WAU_8</b>       | 1982 | Singapore | - | WGS Reads | Illumina Genome Analyzer II | SAMEA1021823 | ERR053014  | Hsu. 2015. GenBiol. PMID:25903077          |
| 497 | <b>WAU_9</b>       | 1985 | Singapore | - | WGS Reads | Illumina Genome Analyzer II | SAMEA1021807 | ERR053015  | Hsu. 2015. GenBiol. PMID:25903077          |
| 498 | <b>WAU_10</b>      | 1985 | Singapore | - | WGS Reads | Illumina Genome Analyzer II | SAMEA1021856 | ERR053016  | Hsu. 2015. GenBiol. PMID:25903077          |
| 499 | <b>WAU_16</b>      | 1996 | Singapore | - | WGS Reads | Illumina Genome Analyzer II | SAMEA1022012 | ERR053022  | Hsu. 2015. GenBiol. PMID:25903077          |
| 500 | <b>WAU_17</b>      | 1996 | Singapore | - | WGS Reads | Illumina Genome Analyzer II | SAMEA1021973 | ERR053023  | Hsu. 2015. GenBiol. PMID:25903077          |
| 501 | <b>WAU_18</b>      | 1996 | Singapore | - | WGS Reads | Illumina Genome Analyzer II | SAMEA1021952 | ERR053024  | Hsu. 2015. GenBiol. PMID:25903077          |
| 502 | <b>WAU_19</b>      | 1996 | Singapore | - | WGS Reads | Illumina Genome Analyzer II | SAMEA1021934 | ERR053025  | Hsu. 2015. GenBiol. PMID:25903077          |
| 503 | <b>WAU_21</b>      | 1996 | Singapore | - | WGS Reads | Illumina Genome Analyzer II | SAMEA1021910 | ERR053027  | Hsu. 2015. GenBiol. PMID:25903077          |
| 504 | <b>WAU_26</b>      | 1997 | Singapore | - | WGS Reads | Illumina Genome Analyzer II | SAMEA1021849 | ERR053032  | Hsu. 2015. GenBiol. PMID:25903077          |
| 505 | <b>WAU_29</b>      | 1997 | Singapore | - | WGS Reads | Illumina Genome Analyzer II | SAMEA1021995 | ERR053035  | Hsu. 2015. GenBiol. PMID:25903077          |
| 506 | <b>WAU_31</b>      | 1997 | Singapore | - | WGS Reads | Illumina Genome Analyzer II | SAMEA1021970 | ERR053037  | Hsu. 2015. GenBiol. PMID:25903077          |
| 507 | <b>WAU_34</b>      | 1997 | Singapore | - | WGS Reads | Illumina Genome Analyzer II | SAMEA1021933 | ERR053040  | Hsu. 2015. GenBiol. PMID:25903077          |
| 508 | <b>WAU_39</b>      | 1997 | Singapore | - | WGS Reads | Illumina Genome Analyzer II | SAMEA1021951 | ERR053044  | Hsu. 2015. GenBiol. PMID:25903077          |
| 509 | <b>T9_N3</b>       | 2008 | Thailand  | - | WGS Reads | Illumina Genome Analyzer II | SAMEA958822  | ERR023888  | Tong. GenRes. 2015. PMID:25491771          |
| 510 | <b>T234_W2</b>     | 2008 | Thailand  | - | WGS Reads | Illumina Genome Analyzer II | SAMEA958806  | ERR023872  | Tong. GenRes. 2015. PMID:25491771          |
| 511 | <b>T71_N2</b>      | 2008 | Thailand  | - | WGS Reads | Illumina Genome Analyzer II | SAMEA958988  | ERR033836  | Tong. GenRes. 2015. PMID:25491771          |
| 512 | <b>T99_N5</b>      | 2008 | Thailand  | - | WGS Reads | Illumina Genome Analyzer II | SAMEA958963  | ERR033828  | Tong. GenRes. 2015. PMID:25491771          |
| 513 | <b>T12_N1</b>      | 2008 | Thailand  | - | WGS Reads | Illumina Genome Analyzer II | SAMEA958848  | ERR023884  | Tong. GenRes. 2015. PMID:25491771          |
| 514 | <b>T271_C1</b>     | 2008 | Thailand  | - | WGS Reads | Illumina Genome Analyzer II | SAMEA958810  | ERR023867  | Tong. GenRes. 2015. PMID:25491771          |
| 515 | <b>T35_N2</b>      | 2008 | Thailand  | - | WGS Reads | Illumina Genome Analyzer II | SAMEA958775  | ERR033823  | Tong. GenRes. 2015. PMID:25491771          |
| 516 | <b>T95_N2</b>      | 2008 | Thailand  | - | WGS Reads | Illumina Genome Analyzer II | SAMEA958962  | ERR033833  | Tong. GenRes. 2015. PMID:25491771          |
| 517 | <b>T192_T3</b>     | 2008 | Thailand  | - | WGS Reads | Illumina Genome Analyzer II | SAMEA958900  | ERR023907  | Tong. GenRes. 2015. PMID:25491771          |
| 518 | <b>T303_N3</b>     | 2008 | Thailand  | - | WGS Reads | Illumina Genome Analyzer II | SAMEA958836  | ERR033080  | Tong. GenRes. 2015. PMID:25491771          |
| 519 | <b>SA13002</b>     | 2012 | China     | - | WGS Reads | Illumina MiSeq              | SAMN03856026 | SRR2097047 | Kong. 2016. PLoS One. PMID:26950298        |
| 520 | <b>SA13005</b>     | 2013 | China     | - | WGS Reads | Illumina MiSeq              | SAMN03878399 | SRR2106469 | Kong. 2016. PLoS One. PMID:26950298        |
| 521 | <b>SA13007</b>     | 2012 | China     | - | WGS Reads | Illumina MiSeq              | SAMN03878400 | SRR2106470 | Kong. 2016. PLoS One. PMID:26950298        |
| 522 | <b>SA13009</b>     | 2012 | China     | - | WGS Reads | Illumina MiSeq              | SAMN03878401 | SRR2106471 | Kong. 2016. PLoS One. PMID:26950298        |
| 523 | <b>SA13012</b>     | 2012 | China     | - | WGS Reads | Illumina MiSeq              | SAMN03878402 | SRR2106472 | Kong. 2016. PLoS One. PMID:26950298        |
| 524 | <b>SA13023</b>     | 2013 | China     | - | WGS Reads | Illumina MiSeq              | SAMN03878403 | SRR2106473 | Kong. 2016. PLoS One. PMID:26950298        |
| 525 | <b>BSAC_st3021</b> | 2010 | England   | - | WGS Reads | Illumina HiSeq 2000         | SAMEA1464569 | ERR124493  | Reuter. GenRes. 2016. PMID:26672018        |
| 526 | <b>BSAC_st3046</b> | 2010 | England   | - | WGS Reads | Illumina HiSeq 2000         | SAMEA1464296 | ERR124495  | Reuter. GenRes. 2016. PMID:26672018        |
| 527 | <b>BSAC_st697</b>  | 2003 | England   | - | WGS Reads | Illumina HiSeq 2000         | SAMEA1464583 | ERR129279  | Reuter. GenRes. 2016. PMID:26672018        |
| 528 | <b>D8</b>          | 2007 | Gambia    | - | WGS Reads | Illumina MiSeq              | SAMEA3727072 | ERR1213802 | Senghore. AppEnvMicro. 2016. PMID:27474712 |
| 529 | <b>DS_009</b>      | 2011 | Thailand  | - | WGS Reads | Illumina HiSeq 2000         | SAMEA3448838 | ERR1069915 | Moradigaravand. mBio. 2017. PMID: 28679748 |
| 530 | <b>DS_014</b>      | 2011 | Thailand  | - | WGS Reads | Illumina HiSeq 2000         | SAMEA3448843 | ERR1069920 | Moradigaravand. mBio. 2017. PMID: 28679748 |
| 531 | <b>US_002</b>      | 2011 | Thailand  | - | WGS Reads | Illumina HiSeq 2000         | SAMEA3448943 | ERR1070030 | Moradigaravand. mBio. 2017. PMID: 28679748 |
| 532 | <b>US_008</b>      | 2011 | Thailand  | - | WGS Reads | Illumina HiSeq 2000         | SAMEA3448948 | ERR1070035 | Moradigaravand. mBio. 2017. PMID: 28679748 |
| 533 | <b>US_030</b>      | 2011 | Thailand  | - | WGS Reads | Illumina HiSeq 2000         | SAMEA3448965 | ERR1070052 | Moradigaravand. mBio. 2017. PMID: 28679748 |
| 534 | <b>US_017</b>      | 2011 | Thailand  | - | WGS Reads | Illumina HiSeq 2000         | SAMEA3448955 | ERR1070042 | Moradigaravand. mBio. 2017. PMID: 28679748 |

A

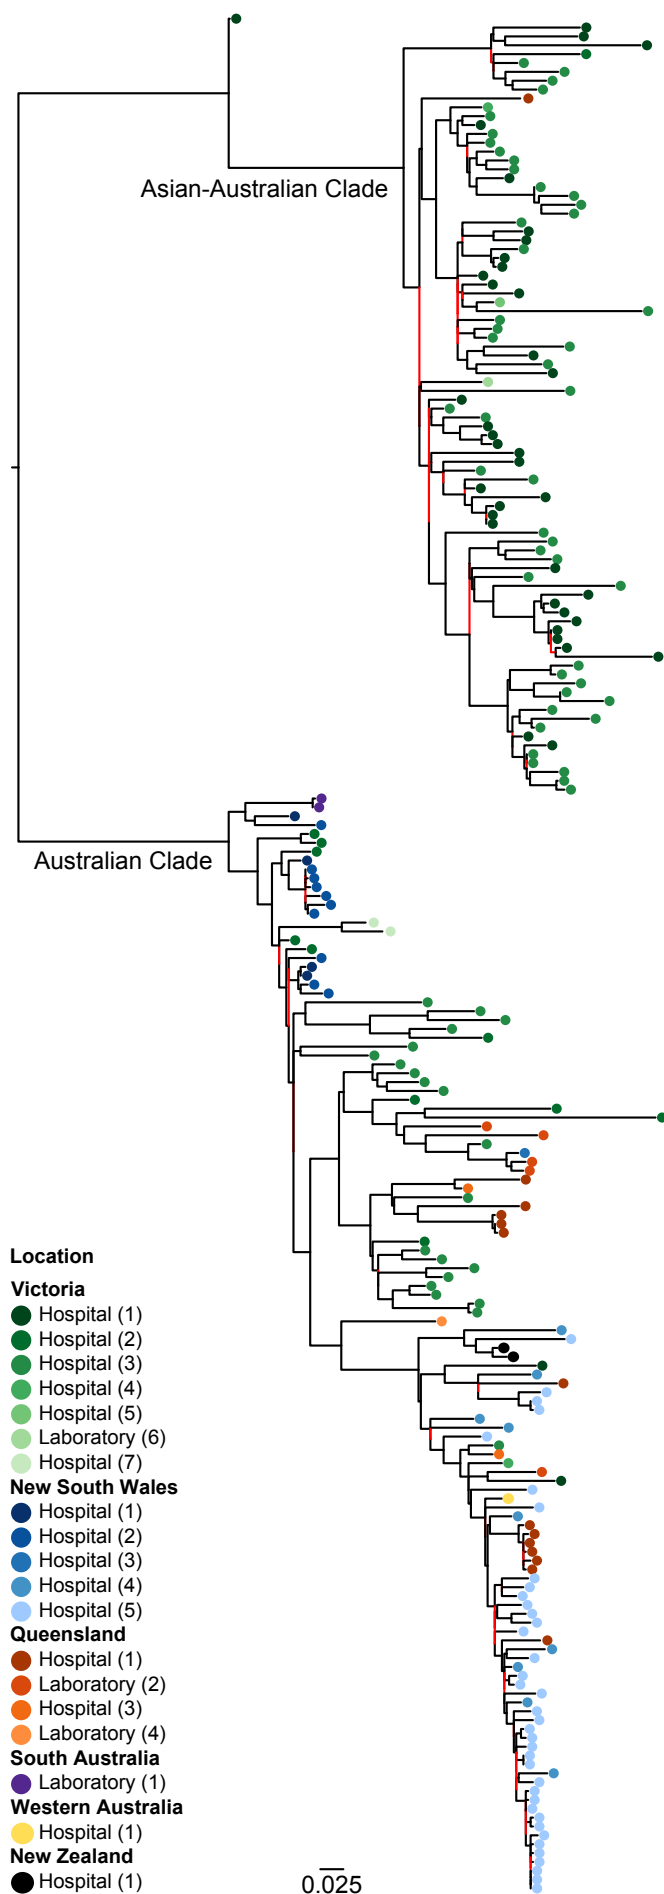

B

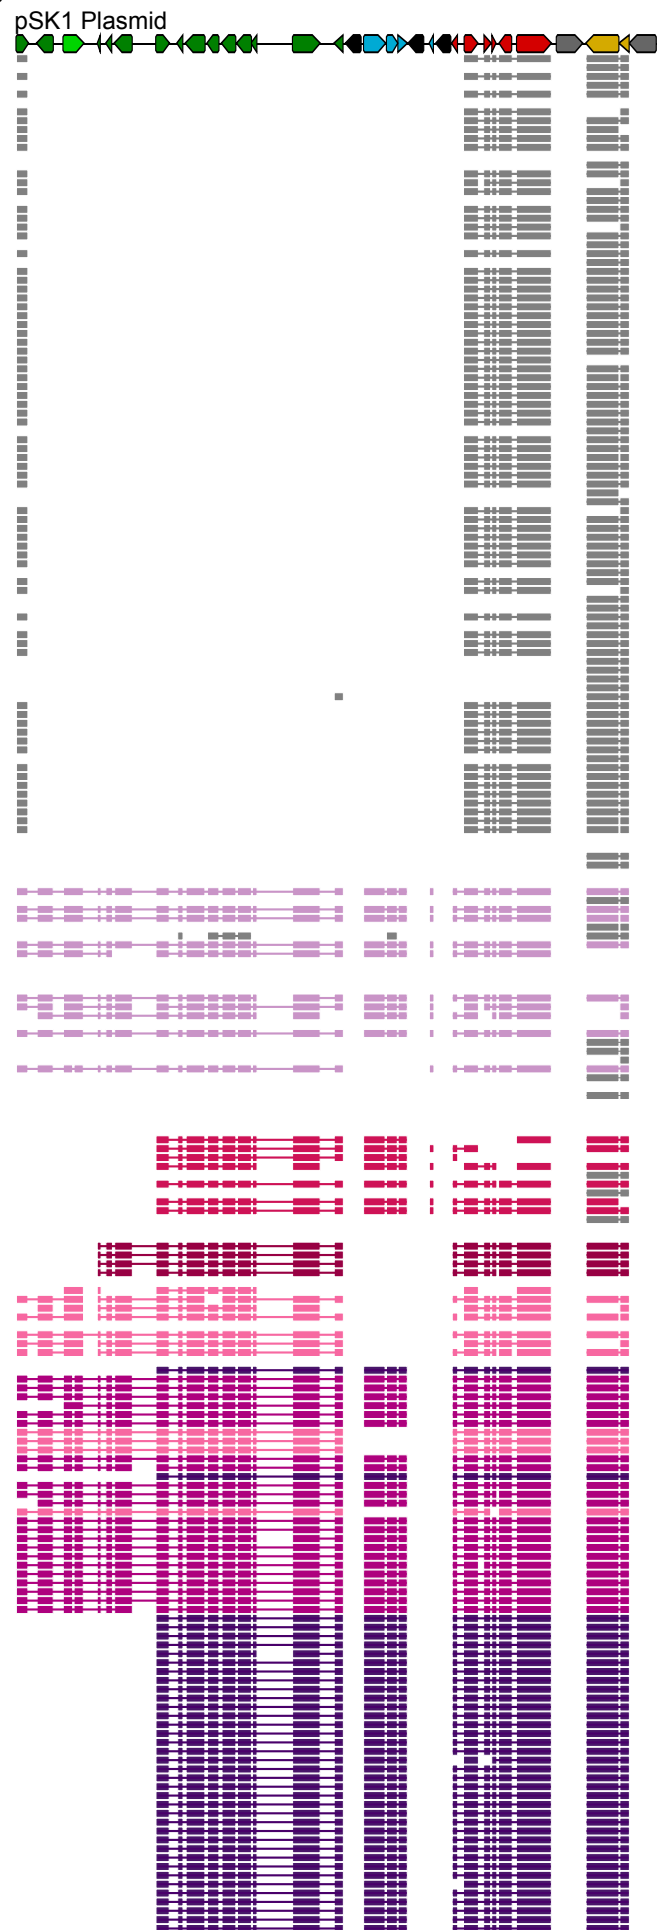

**Supplementary Figure S1. pSK1 plasmid gene presence and synteny.** (A) Maximum likelihood phylogenetic tree inferred from 3,883 core genome SNPs illustrates the population structure of ST239 *S. aureus* in Australia. Tips are coloured based on location (refer to key). Branches with < 70% bootstrap support are coloured red. (B) Coloured blocks represent the identification of a pSK1 gene orthologue, using a 95% amino acid homology threshold (excluding insertion sequences). Box length is reflective of gene length and ordered based on pSK1 (Figure 2A). Boxes are linked if orthologues were found to be syntenic. Coloured boxes reflect the six identified patterns.

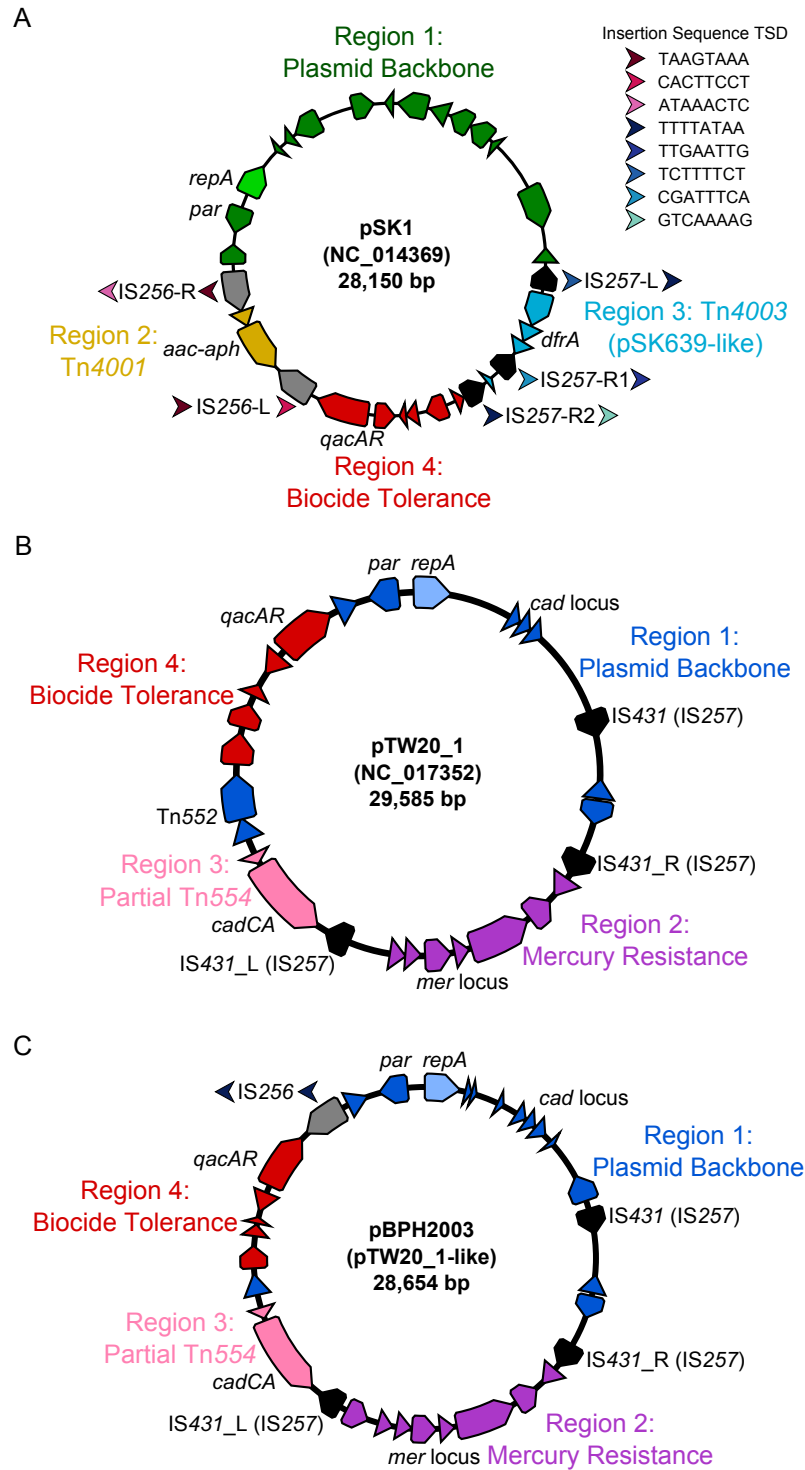

**Supplementary Figure S2. Structure of pSK1, pTW20\_1 and pBPH2003 plasmids.** Plasmid genes have been coloured based on defined plasmid regions. Insertion sequences (IS) are coloured grey (IS256) and black (IS257), with target site duplications (TSD) illustrated: arrows indicate upstream/downstream sequences, orientation, and are coloured to represent unique sequences (refer to key). (A) pSK1; sequence and annotations are that previously published, accession NC\_014369. (B) pTW20\_1; sequence and annotations are that previously published, accession NC\_017352. (C) pBPH2003; a pTW20\_1-like plasmid representative of that harboured in isoaltes from the Asian-Australian ST239 clade.

### Supplementary Figure 3

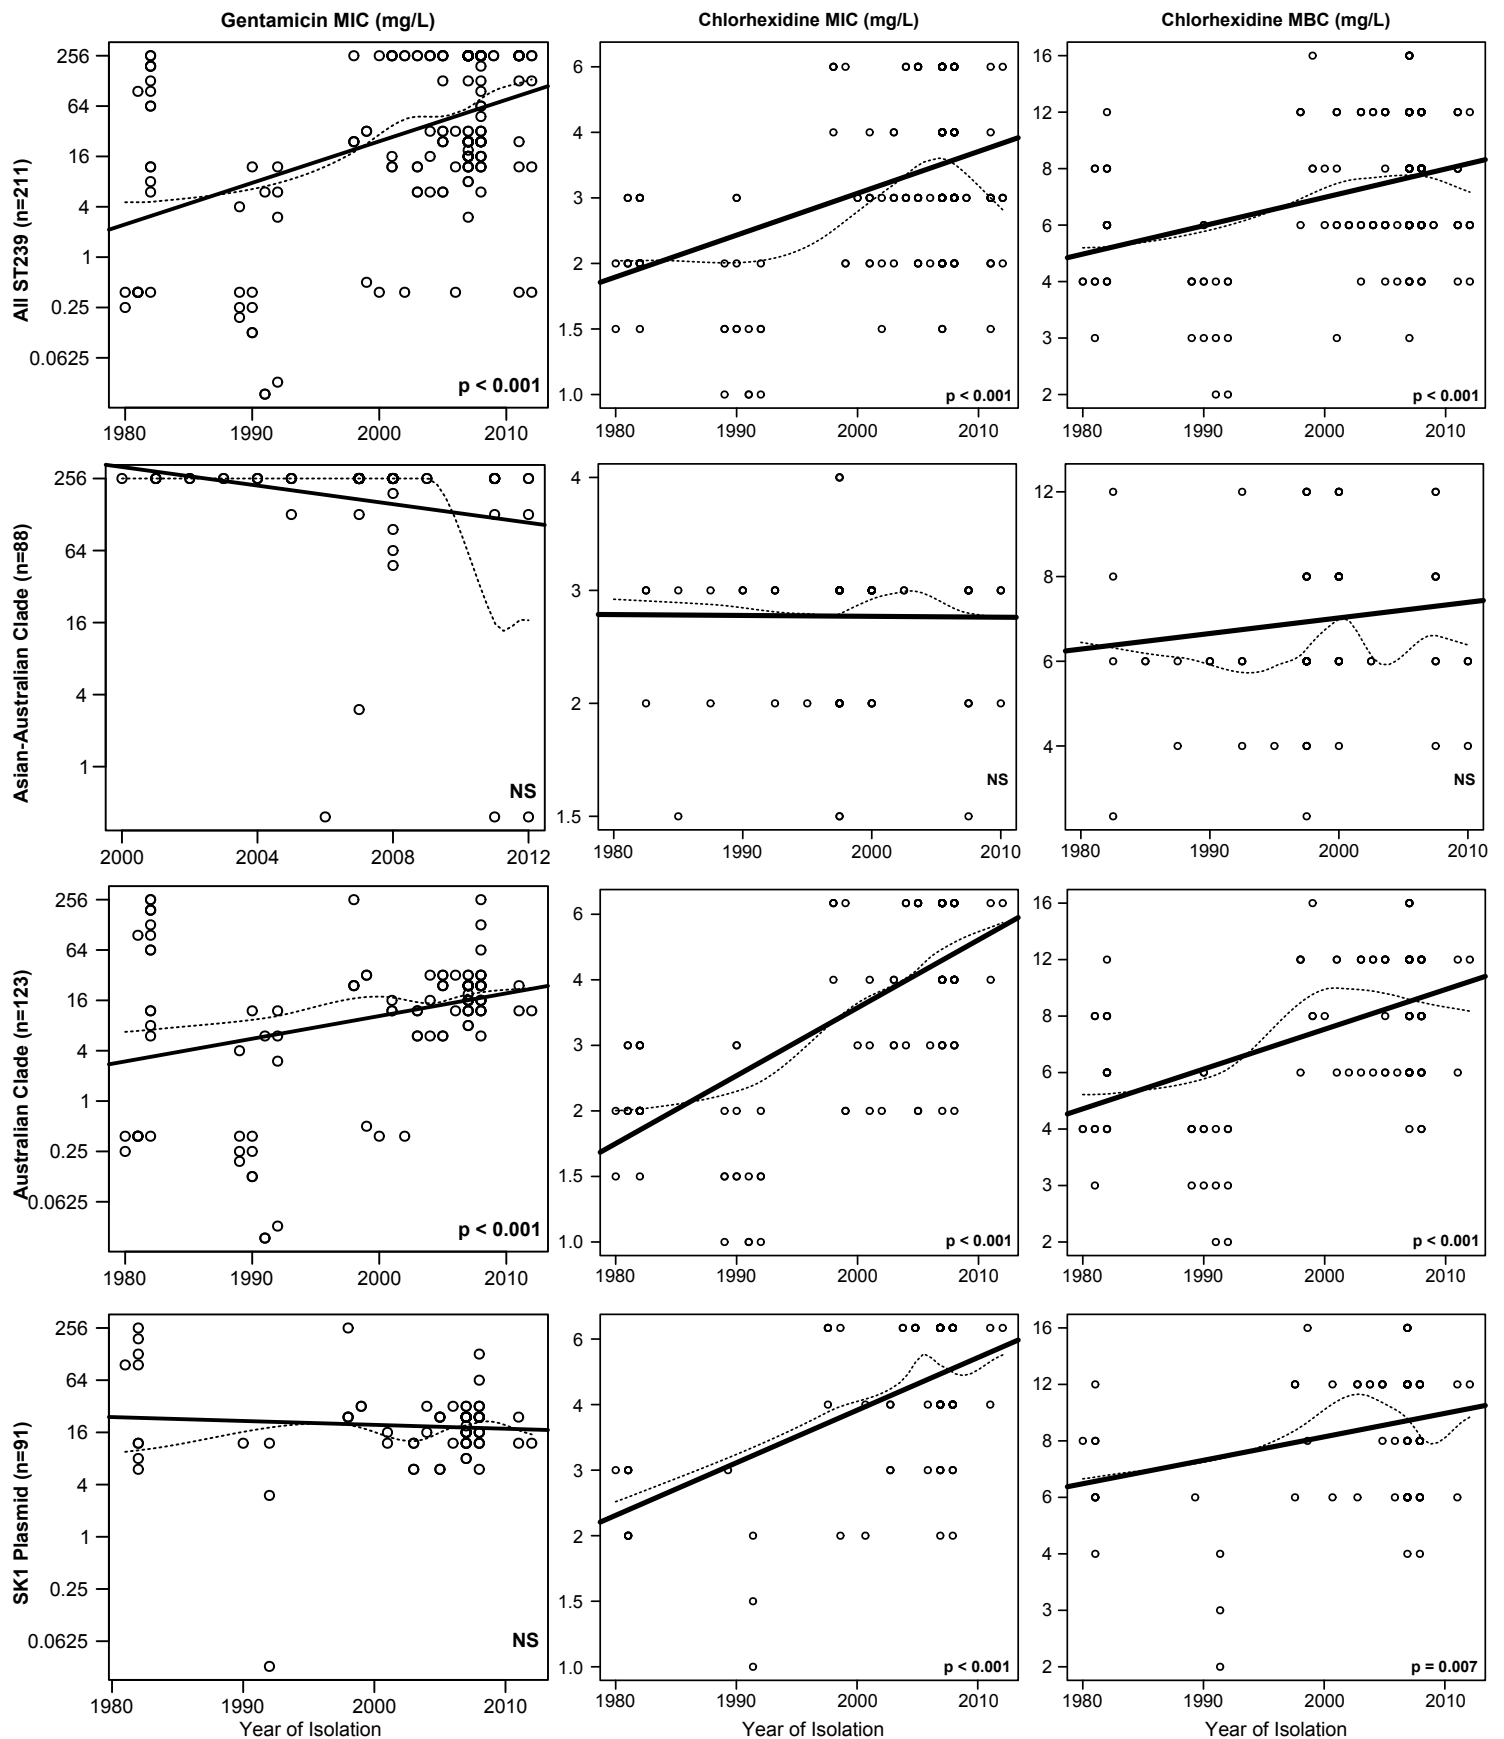

**Supplementary Figure S3. Modelling temporal-association in phenotypic susceptibility data.** Graphs depict linear models developed to explore the potential association between gentamicin MIC, and chlorhexidine MIC and MBC with the year in which isolates were recovered. The dotted lines indicate the smoothed mean MIC and the bold lines indicate the fitted linear model. Four populations were tested (from top to bottom): (i) All ST239 MRSA (n = 211), (ii) the Asian-Australian clade (n = 88), (iii) the Australian clade (n = 123), and (iv) the pSK1-like plasmid harbouring population (n = 91). Note: reference JKD6008 (Australian clade) was not tested.



## Supplementary Figure 4

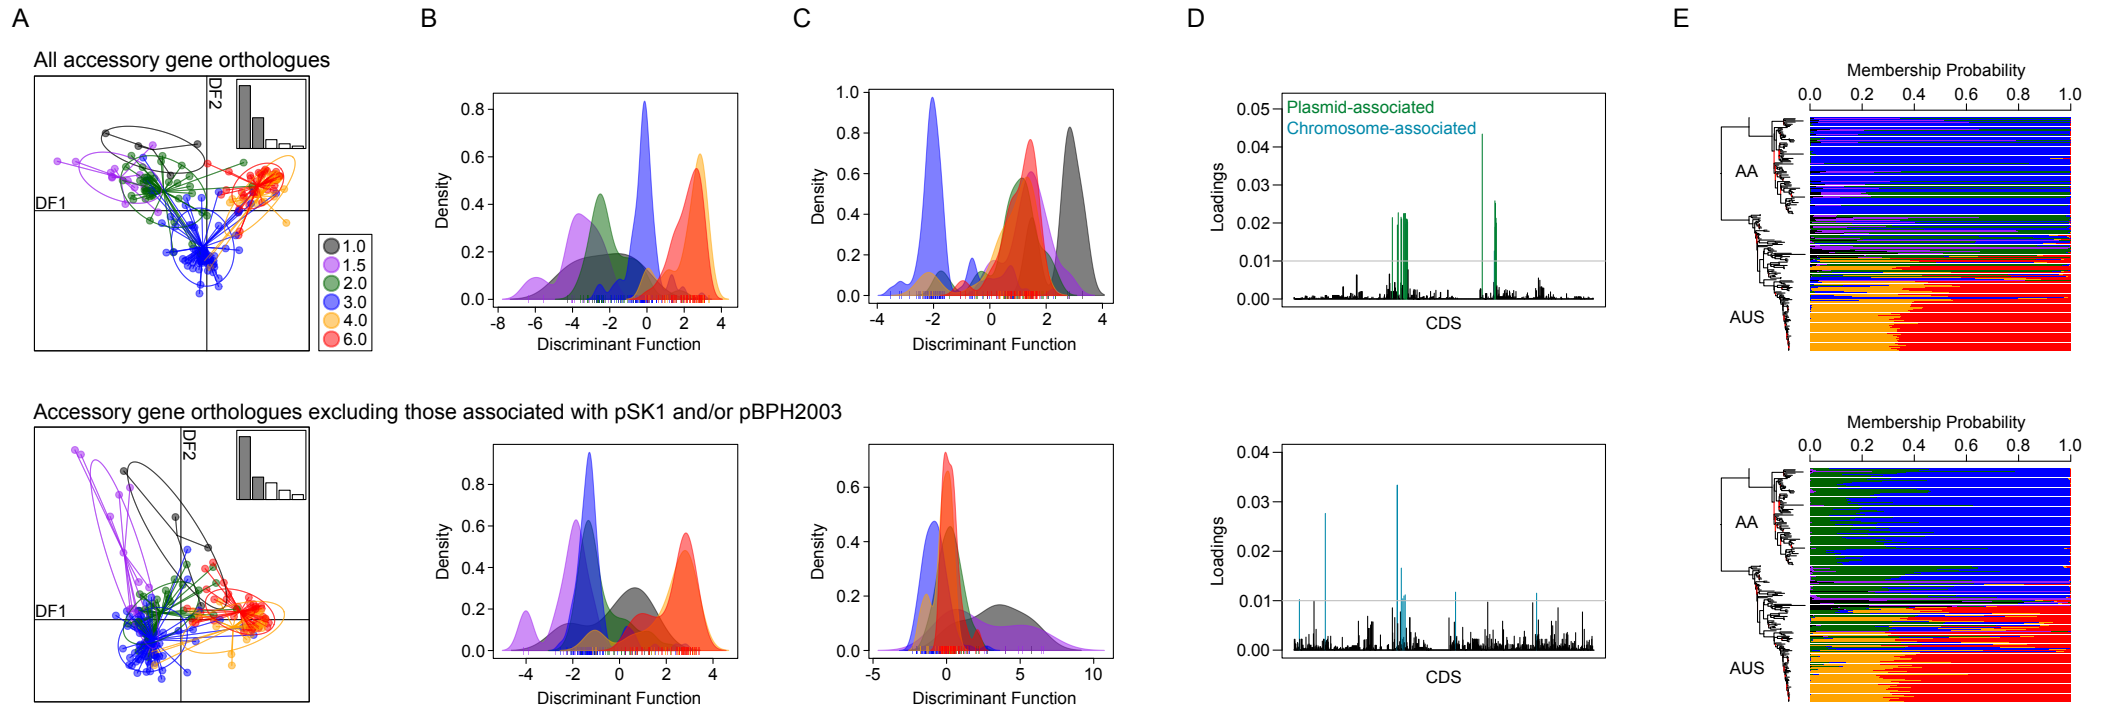

**Supplementary Figure S4. Exploration of gene presence/absence signatures associated with phenotypic chlorhexidine tolerance.** The graphs illustrate the findings from two Discriminant Analysis of Principle Components (DAPC) models, used to investigate genetic signatures in the ST239 MRSA population associated with chlorhexidine MIC. The first model (top panel) examined all accessory gene orthologues (clustered at 95% amino acid homology), and in the second model (bottom panel) gene orthologues associated with either pSK1 or pBPH2003 (representative of the pTW20\_1-like plasmid recovered from the Asian-Australian clade) were excluded. The prior hypothesised sub-divisions represent the phenotypic CHX MIC values for the population, as indicated in the key. (A) Scatter plots illustrate the clustering of isolates across the two most discriminant functions. The density plots illustrate the same data in a one-dimensional format for the first (B) and second (C) most discriminant functions. (D) Loading plots illustrate the contributions of all gene orthologues to the DAPC models, with the most highly contributing variables ( $> 0.01$ ) coloured based on whether they represent a plasmid-associated (green) or chromosomal gene orthologues (blue). (E) Membership graphs illustrate the membership profiles for all isolates, aligned to a maximum likelihood phylogenetic tree for the ST239 population. The probability index indicates the likelihood of assigning an isolate back to one of the hypothesised sub-divisions.

Figure S5

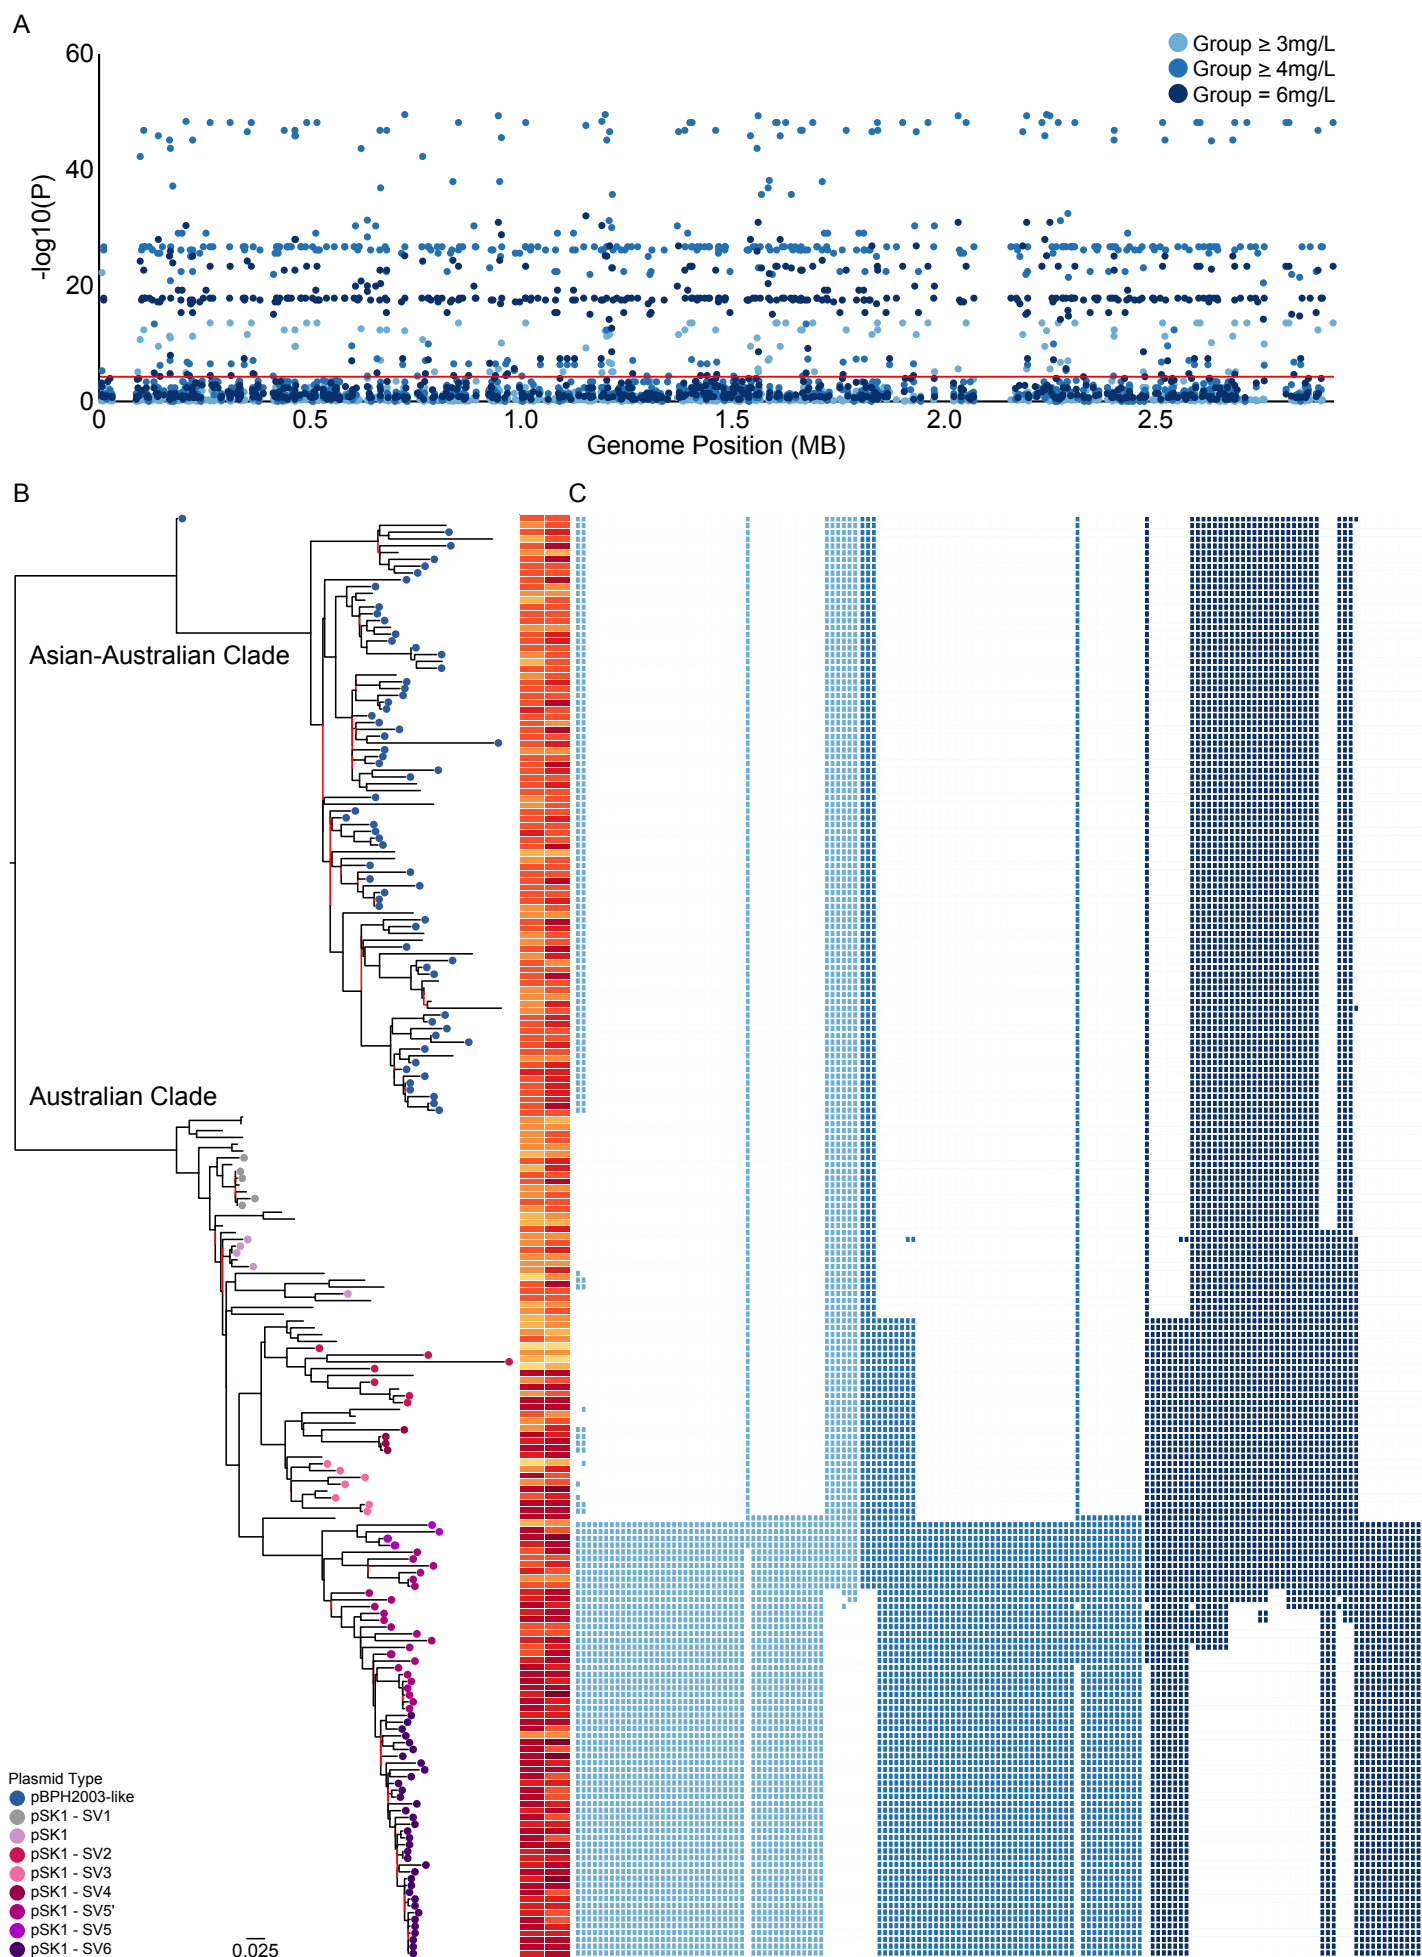

**Supplementary Figure S5. Exploration of mutations associated with phenotypic chlorhexidine tolerance.** (A) Manhattan plot illustrates the results of three Genome Wide Association Studies (GWAS) conducted to identify core genome SNPs associated with CHX MIC, tested at three thresholds: MIC > 3 mg/L, > 4 mg/L or = 6 mg/L. Red line indicates the threshold for significance (with Bonferroni correction). (B) Maximum likelihood phylogenetic tree is that from Figure S1, and adjacent are the phenotypic CHX MIC and MBC values (coloured yellow to red with increasing value). (C) The presence (blue) or absence (white) of the 50 most significantly associated mutations detected at each phenotypic threshold are illustrated.
